1 **Scaffold-level genome assemblies of two parasitoid**  
2 **biocontrol wasps reveal the parthenogenesis**  
3 **mechanism and an associated novel virus.**

4 Inwood, S.N<sup>1</sup>§., Skelly, J.<sup>1,2</sup>§., Guhlin, J.<sup>3</sup>, Harrop, T.<sup>4</sup>, Goldson, S.<sup>5</sup>, Dearden, P.K<sup>1,3\*</sup>.

5

6 <sup>1</sup> Bioprotection Aotearoa and Biochemistry Department, University of Otago, Dunedin,

7 Aotearoa-New Zealand

8 <sup>2</sup> Humble Bee Bio, Wellington, Aotearoa-New Zealand

9 <sup>3</sup> Genomics Aotearoa, University of Otago, Dunedin, Aotearoa-New Zealand.

10 <sup>4</sup> Melbourne Bioinformatics, The University of Melbourne, Parkville, VIC,

11 3010, Australia

12 <sup>5</sup> Biocontrol and Biosecurity Group, AgResearch Limited, Lincoln, Aotearoa-New Zealand.

13

14 \*To whom correspondence should be addressed.

15 § These first authors contributed equally to this work and are listed alphabetically.

16

17 **Keywords**

18 Genome assembly, metagenome assembly, *Microctonus*, endoparasitoid wasp, biocontrol,

19 parthenogenesis, virus

20

## 21 Abstract

### 22 Background

23 Biocontrol is a key technology for the control of pest species. *Microctonus* parasitoid wasps  
24 (Hymenoptera: Braconidae) have been released in Aotearoa New Zealand as biocontrol  
25 agents, targeting three different pest weevil species. Despite their value as biocontrol  
26 agents, no genome assemblies are currently available for these *Microctonus* wasps, limiting  
27 investigations into key biological differences between the different species and strains  
28 .

### 29 Methods and findings

30 Here we present high-quality genomes for *Microctonus hyperodae* and *Microctonus*  
31 *aethiopoides*, assembled with short read sequencing and Hi-C scaffolding. These assemblies  
32 have total lengths of 106.7 Mb for *M. hyperodae* and 129.2 Mb for *M. aethiopoides*, with  
33 scaffold N50 values of 9 Mb and 23 Mb respectively. With these assemblies we investigated  
34 differences in reproductive mechanisms, and association with viruses between *Microctonus*  
35 wasps. Meiosis-specific genes are conserved in asexual *Microctonus*, with *in-situ*  
36 hybridisation validating expression of one of these genes in the ovaries of asexual  
37 *Microctonus aethiopoides*. This implies asexual reproduction in these *Microctonus* wasps  
38 involves meiosis, with the potential for sexual reproduction maintained. Investigation of viral  
39 gene content revealed candidate genes that may be involved in virus-like particle production

40 in *M. aethiopoides*, as well as a novel virus infecting *M. hyperodae*, for which a complete  
41 genome was assembled.

42

### 43 **Conclusion and significance**

44 These are the first published genomes for *Microctonus* wasps used for biocontrol in  
45 Aotearoa New Zealand, which will be valuable resources for continued investigation and  
46 monitoring of these biocontrol systems. Understanding the biology underpinning  
47 *Microctonus* biocontrol is crucial if we are to maintain its efficacy, or in the case of *M.*  
48 *hyperodae* to understand what may have influenced the significant decline of biocontrol  
49 efficacy. The potential for sexual reproduction in asexual *Microctonus* is significant given  
50 that empirical modelling suggests this asexual reproduction is likely to have contributed to  
51 biocontrol decline. Furthermore the identification of a novel virus in *M. hyperodae* highlights  
52 a previously unknown aspect of this biocontrol system, which may contribute to premature  
53 mortality of the host pest . These findings have potential to be exploited in future in attempt  
54 to increase the effectiveness of *M. hyperodae* biocontrol.

55

## 56 **Background**

57

58 Species in the genus of *Microctonus* (Wesmael, 1835) (Hymenoptera: Braconidae) have been  
59 found to be effective biocontrol agents against forage production weevil pests in Aotearoa  
60 New Zealand (NZ), against which they are the primary form of control (Figure 1). *M.*  
61 *hyperodae* has been found to provide effective biological control against the Argentine stem

62 weevil (ASW) *Listronotus bonariensis* (Kuschel) (Coleoptera: Curculionidae), a severe pest of  
63 Gramineae which causes an estimated NZD\$200 million in damage p.a. (Ferguson et al.,  
64 2019), while strains of *M. aethiopoidea* Loan are effective against the clover root weevil  
65 *Sitona obsoletus* (Gmelin) (Coleoptera: Curculionidae), which causes an estimated NZD\$235  
66 in damage p.a. (Ferguson et al., 2019), and the lucerne weevil *Sitona discoideus* (Gyllenhal)  
67 (Figure 1).

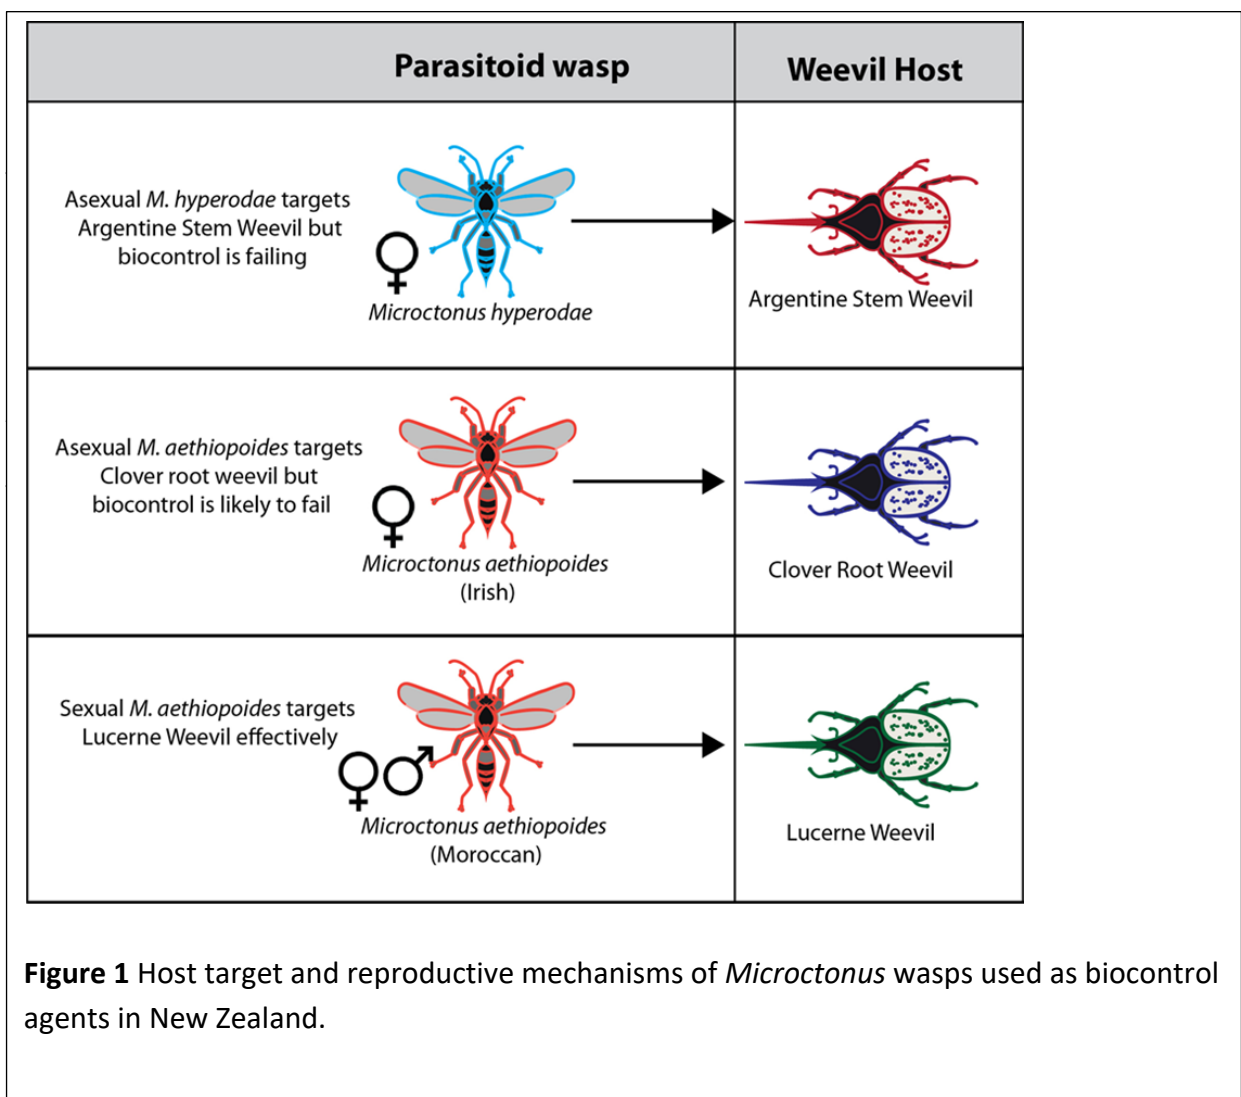

82 behaviours by the weevil (Shields, Wratten, Phillips, et al., 2022; Shields, Wratten, Van  
83 Koten, et al., 2022).

84

85 *S. discoideus* is controlled by a sexually reproducing strain of *M. aethiopoides* from the  
86 Mediterranean area (Stufkens et al., 1987) and is often referred to as the Moroccan strain  
87 (e.g. Gerard et al., 2006), released for biocontrol in 1982. This *M. aethiopoides* strain was  
88 subsequently found to have no appreciable effect on the invasive populations of *S. obsoletus*  
89 (Barratt et al., 1997), resulting in a widespread European search for a suitable parasitoid. A  
90 sexually reproducing French strain of *M. aethiopoides* (Goldson, McNeill, et al., 2004) was  
91 found to be effective against *S. obsoletus*, however in quarantine it was found to hybridise  
92 with the Moroccan strain producing offspring with greatly reduced efficacy against both  
93 *Sitona* spp, precluding its use for biocontrol in NZ (Goldson et al., 2003). Continued searching  
94 led to the discovery of an asexual European strain of *M. aethiopoides* in Ireland, which  
95 reproduces asexually via thelytokous parthenogenesis which would not hybridise with the  
96 Moroccan strain (McNeill et al., 2006). This permitted its widespread rearing and release and  
97 the eventual suppression of the weevil (Gerard et al., 2006, 2011).

98

99 Presence of two reproductive strategies within the *M. aethiopoides* spp. raises interesting  
100 questions as to the underlying mechanisms of asexuality in the *Microctonus* genus. While  
101 the *M. hyperodae* population in NZ was found to be asexual, four impotent male *M.*  
102 *hyperodae* were discovered amongst the founding 251 the adult *M. hyperodae* reared from  
103 weevils from South America (Goldson et al., 1990), indicating some ability to reproduce  
104 sexually. Preliminary examination of the biological underpinnings of reproductive mode in

105 *M. hyperodae* using allozymes revealed an absence of recombination, inferred from a lack of  
106 certain homozygous genotypes despite prevalent heterozygotes in populations (Iline &  
107 Phillips, 2004). From this lack of recombination, it was suggested that *M. hyperodae*  
108 parthenogenesis might be apomictic, using mitosis rather than meiosis. However, more  
109 recently the conservation and expression of core meiosis genes in *M. hyperodae* ovaries has  
110 been demonstrated, indicating that *M. hyperodae* parthenogenesis may involve meiosis  
111 thereby retaining the potential for sexual reproduction (Inwood et al., 2023). No such  
112 investigation of the parthenogenesis mechanism of the *M. aethiopoidea* Irish strain has been  
113 performed to date.

114

115 Another difference between *Microctonus* wasps is in the presence and transmission of virus  
116 particles during parasitism. Endogenous viral elements (EVEs) in the form of polydnviruses  
117 (PDVs) or virus-like particles (VLPs) as well as exogenous viruses, often play a role in the  
118 parasitism processes of koinobiont endoparasitoids, particularly in host immune-suppression  
119 (Coffman et al., 2022; Di Giovanni et al., 2020; Drezen et al., 2017; Martinez et al., 2012; Ye  
120 et al., 2018). Barratt et al. (1999, 2006) detected the presence of viral particles in the ovarian  
121 epithelial cells of the sexual Moroccan strain of *M. aethiopoidea*, with no viral particles found  
122 in other *Microctonus* strains or species. There has been no further investigation into the  
123 presence of EVEs or infectious viruses associated with the *Microctonus* wasps, and no  
124 investigation using genomic data.

125

126 A more comprehensive investigation into the potential presence of viruses or EVEs in *M.*  
127 *hyperodae* is required due to a phenomenon of premature mortality observed in *L.*

128 *bonariensis*, whereby greater weevil mortality was observed in the presence of an adult *M.*  
129 *hyperodae* than could be explained by parasitism alone (Goldson, McNeill, & Proffitt, 1993;  
130 Goldson, Proffitt, et al., 2004; Vereijssen et al., 2011). The current hypothesis is that there  
131 may be a toxin-antitoxin system acting during parasitism, whereby *M. hyperodae* transmits  
132 something toxic during an unsuccessful ovipositional attempt, which is offset by an ovarian  
133 extract during successful parasitism (Vereijssen et al., 2011). This toxin-antitoxin  
134 phenomenon has also been observed with the parasitoid *Asobara japonica* Forster  
135 (Hymenoptera: Braconidae) and its *Drosophila* host, with the source of toxicity revealed to  
136 be virus particles (Furihata et al., 2016; Furihata & Kimura, 2009). The variance in virus  
137 particle detection between *Microctonus* species, and the premature mortality phenomenon  
138 associated with *M. hyperodae* therefore necessitate an investigation into the viral gene  
139 content of the *Microctonus* spp. genome assemblies, and further investigation into the  
140 virome of *M. hyperodae*.

141  
142 Given the range of host targets and reproductive modes, and the importance of biocontrol  
143 to a pastoral economy, the genomes of *M. hyperodae* and *M. aethiopoides* have the  
144 potential to determine factors that influence biocontrol efficacy, such as genomic correlates  
145 of the reproductive mode and host preference, offering a basis for a better understanding  
146 the biology of these biocontrol systems. Here we present the scaffolded genomes of two  
147 *Microctonus* species, *M. hyperodae* and *M. aethiopoides*, with additional assemblies for a  
148 further two *M. aethiopoides* strains with divergent biology, and that of a previously  
149 undetected virus found to be infecting *M. hyperodae*, which provide a unique insight into  
150 parasitoid reproduction and commensal viruses that play key roles in parasitic life history.

151 These are valuable genomic resources for understanding the biology of *Microctonus*  
152 biocontrol and ongoing investigations into its success or decline in NZ, which is crucial if we  
153 are to maintain its efficacy.

154

## 155 Results and Discussion

156

### 157 Wasp Genome assembly

158

159 Bacterial endosymbionts, particularly *Rickettsia*, *Wolbachia*, and *Cardinium* can induce  
160 parthenogenesis in insects (Ma & Schwander, 2017), while maintaining the potential for  
161 sexual reproduction (Arakaki et al., 2000; Stouthamer et al., 1990). As *M. hyperodae* and the  
162 Irish strain of *M. aethiopoulos* reproduce asexually, the presence of such endosymbionts was  
163 investigated using Kraken2 read classification. Kraken2 analysis resulted in the classification  
164 of 17.7%, 17.3%, 17.4% and 7.25% of reads from *M. aethiopoulos* Irish, French, and  
165 Moroccan strains, and *M. hyperodae*, with most remaining unclassified (as the database  
166 does not contain insects). Classification of reads as known parthenogenesis-inducing  
167 endosymbiont genera was low, with 0.05% or less as *Rickettsia*, 0.01% or less of reads  
168 classified as *Wolbachia*, and 0.00% as *Cardinium*. There was no correlation between the  
169 percentage of reads assigned to the three genera and the reproductive mechanism of the  
170 parasitoids. These results are consistent with previous RNA-seq read classification and PCR



171 results from *M. hyperodae* (Inwood et al., 2023), and with antibiotic and heat treatment  
172 failing to revert the asexual reproduction mechanism of *Microctonus* wasps (Phillips, 1995).  
173  
174 Using short-read Illumina sequencing, draft genomes were produced for *M. hyperodae*, and  
175 the Irish, French and Moroccan strains of *M. aethiopoides*, containing 105-128 Mb of total  
176 sequence, with a BUSCO completeness of 86.8-93.2% (Table 1). Hi-C scaffolding of the *M.*  
177 *hyperodae* and Irish *M. aethiopoides* assemblies improved these assemblies substantially,  
178 with N50 lengths increasing from 15 Kb to 9 Mb for *M. hyperodae* and from 64 Kb to 23 Mb  
179 for *M. aethiopoides* Irish (Table 1). The contiguity of these scaffolded *Microctonus*  
180 assemblies (Table 1) are comparable to the model insects *D. melanogaster*, *A. mellifera* and  
181 *N. vitripennis*, which have N50 lengths of 25.2 Mb, 13.6 Mb and 24.7 Mb, and L50 values of  
182 3, 5 and 7. Compared to other scaffolded Hymenopteran genomes available on NCBI  
183 (<https://www.ncbi.nlm.nih.gov/data-hub/genome/?taxon=7399>, accessed 14/09/22,  
184 excluding contig assemblies) the *M. aethiopoides* Irish Hi-C assembly has an N50 length  
185 higher than 90% of assemblies, and *M. hyperodae* higher than 75% of assemblies, indicating  
186 that these genomes are more contiguous than most scaffolded Hymenopteran genomes,  
187 with a high level of BUSCO completeness (Table 1).

188

189 **Table 1** Assembly and annotation statistics for Meraculous and Hi-C scaffolded assemblies  
190 for *M. hyperodae* and *M. aethiopoides* strains. BUSCO completeness (%) refers to the

191 number of BUSCO genes found complete (whether single-copy or duplicated) in the genome  
 192 assemblies.

|                                   | Hi-C assemblies |                        | Meraculous assemblies |                        |                         |                           |
|-----------------------------------|-----------------|------------------------|-----------------------|------------------------|-------------------------|---------------------------|
|                                   | M. hyperodae    | M. aethiopoide s Irish | M. hyperoda e         | M. aethiopoid es Irish | M. aethiopoid es French | M. aethiopoid es Moroccan |
| Total length (Mb)                 | 106.7           | 129.2                  | 105.8                 | 128.8                  | 118.9                   | 120.3                     |
| Number of scaffolds               | 3663            | 2844                   | 14207                 | 6322                   | 10395                   | 13735                     |
| Scaffold N50 (bp)                 | 9364176         | 23025277               | 15392                 | 64081                  | 30183                   | 17930                     |
| L50                               | 5               | 3                      | 1758                  | 484                    | 881                     | 1634                      |
| GC (%)                            | 29.5            | 29.4                   | 29.5                  | 29.4                   | 29.3                    | 29.4                      |
| Genome BUSCO completeness (%)     | 89.8            | 93.9                   | 86.8                  | 93.2                   | 90.7                    | 89.1                      |
| Predicted genes                   | 11744           | 12474                  | 13667                 | 13521                  | 14229                   | 14475                     |
| Annotation BUSCO completeness (%) | 87.9            | 94.0                   | 85.2                  | 90.7                   | 88.4                    | 85.8                      |

193

194 The Hi-C data suggests variance of chromosome number between *M. hyperodae* and *M.*

195 *aethiopoides*, with 12 and eight Hi-C scaffolds respectively. Investigation of chromosome

196 synteny suggests that chromosomes 1-4 in *M. aethiopoides* are each represented by two

197 chromosomes in *M. hyperodae* (Figure 2), which may represent fusion of chromosomes in

198 *M. aethioides*, or fragmentation of chromosomes in *M. hyperodae* in the time since they  
199 have diverged.

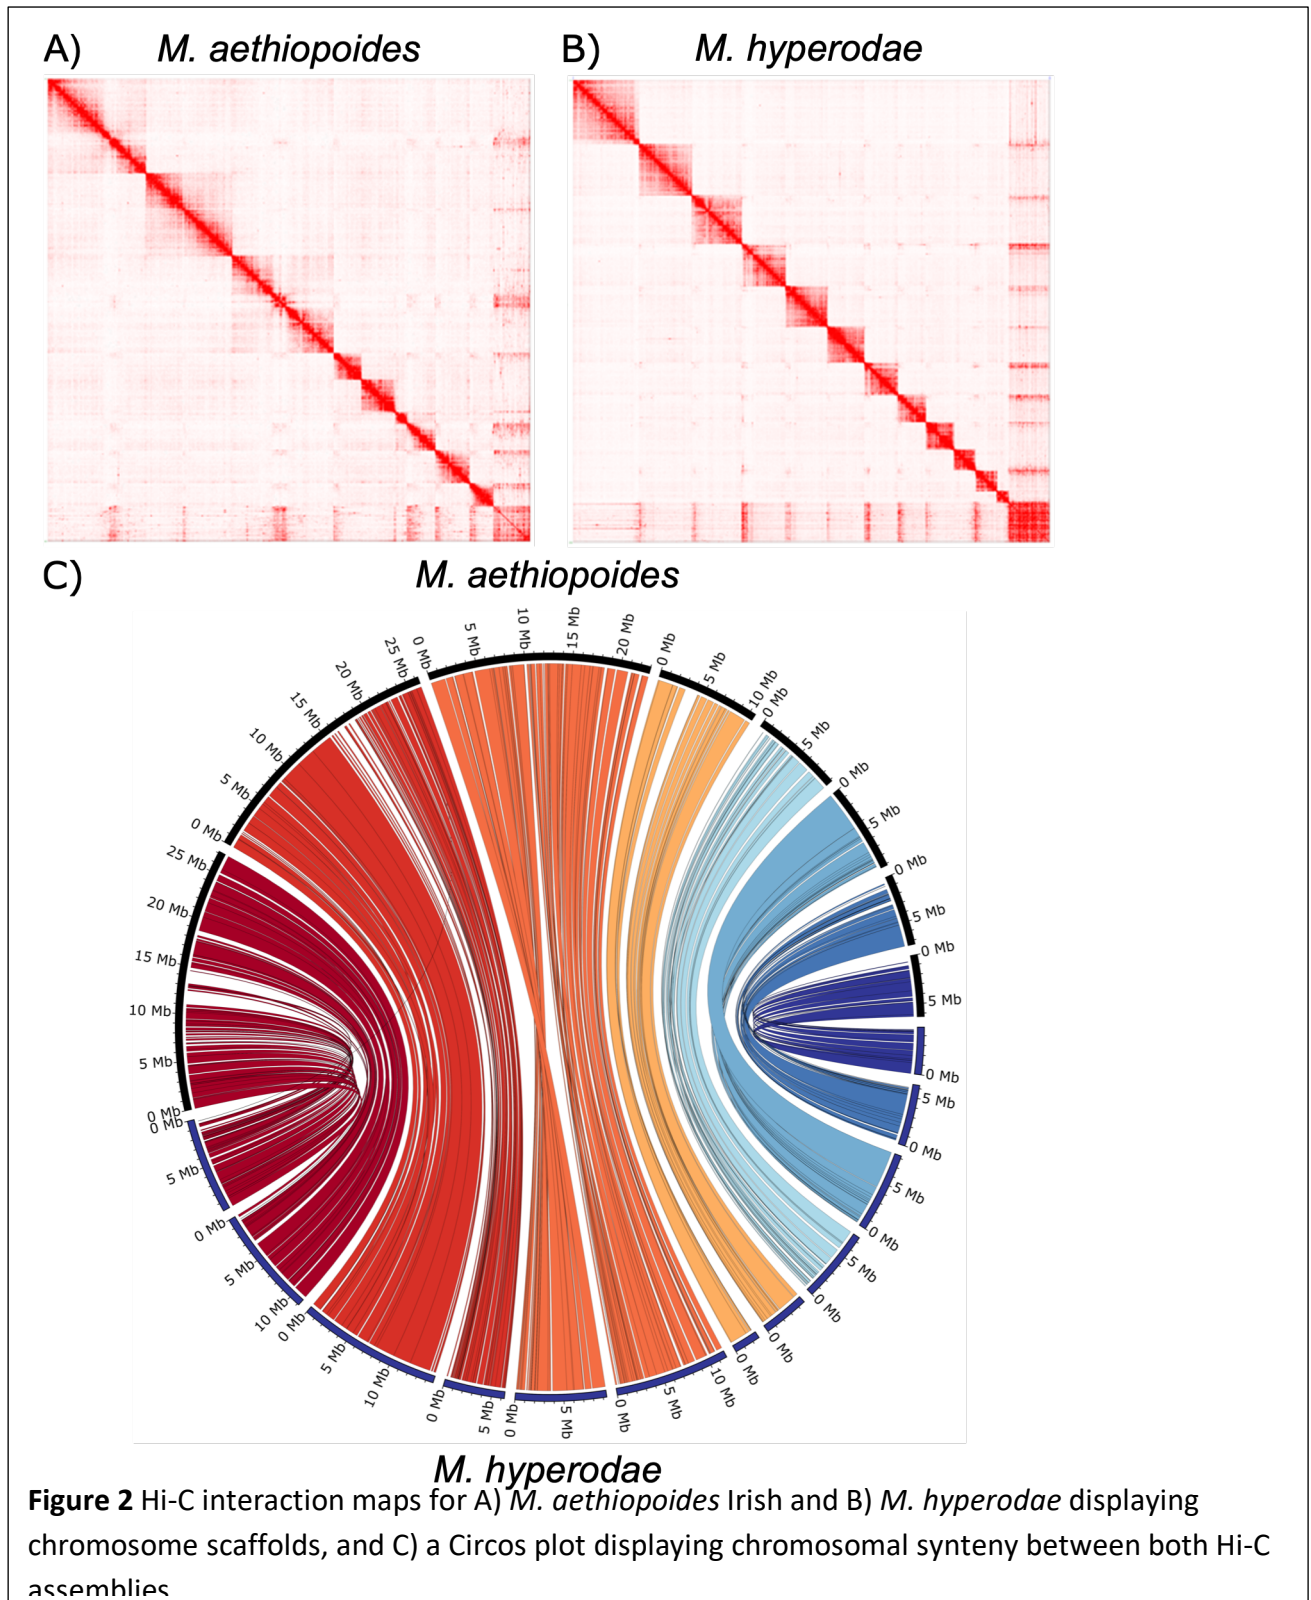

200

## 201 Wasp Genome annotation

202

203 Gene prediction of *Microctonus* genomes was performed with Funannotate, resulting in  
204 12,982 to 14,475 gene predictions for each assembly, with a BUSCO completeness of 85.2 to  
205 94.1% (Table 1). The high gene prediction BUSCO completeness is comparable to other  
206 parasitoid wasps (Dalla Benetta et al., 2020; Gauthier et al., 2021) implying that these are  
207 high-quality genomes and gene predictions. While Hi-C scaffolding improved assembly  
208 contiguity, there was little difference in BUSCO gene prediction results, indicating the short-  
209 read only assemblies are still contiguous enough for gene prediction. Only the gene  
210 prediction performed for *M. hyperodae* used RNA-seq data (two ovarian samples), and while  
211 this may have resulted in improved gene prediction for the *M. hyperodae* assembly,  
212 particularly for genes with high expression in the ovaries, the *M. hyperodae* gene  
213 predictions, for both the unscaffolded and scaffolded assemblies, had lower BUSCO  
214 completeness scores than those for the *M. aethioides* assemblies.

215

216 Using these high-quality annotations, the divergence between *M. hyperodae* and *M.*  
217 *aethioides* strains was estimated, indicating that the French and Moroccan strains (both  
218 sexually reproducing) are more closely related than either is to the asexual Irish strain, with  
219 the Irish strain estimated to have diverged from the sexually reproducing strains 2 million  
220 years ago (MYA), and the two sexually reproducing strains diverging 1 MYA (Supplementary  
221 figure 1). The divergence between *M. hyperodae* and *M. aethioides* is estimated to be 17

222 MYA (Supplementary figure 1). This is a larger divergence estimate than was suggested by  
223 previous morphological and genetic analysis (Vink et al., 2003).

224

225

## 226 Meiosis gene inventory in sexual and asexual strains

227

228 A 'meiosis detection toolkit' has been described for investigation of asexual reproduction  
229 mechanisms in Hymenoptera, cataloguing the presence or absence of genes with known  
230 roles in mitosis or meiosis (Schurko & Logsdon, 2008). In an organism that does not use  
231 meiosis for gamete production there is no evolutionary constraint on core meiosis genes, so  
232 it is expected that their sequence and function would not be conserved (Schurko et al., 2010;  
233 Schurko & Logsdon, 2008). Loss of these core meiosis genes would lead to obligate  
234 parthenogenesis, where reversion to sexual reproduction is not be possible. This toolkit was  
235 used to clarify whether asexual reproduction in *M. hyperodae* and Irish *M. aethiopoides* is  
236 automictic, involving meiosis, or apomictic, relying solely on mitosis for egg production  
237 which cannot be reverted to sexual reproduction.

238

239 This analysis found 36 of 40 meiosis toolkit genes present in single copies in all *Microctonus*  
240 *aethiopoides* assemblies, with the same 36 found in *M. hyperodae* with the addition of  
241 RECQ2 (Figure 3). The presence/absence of these genes in these *Microctonus* species is  
242 segregated by phylogenetic relatedness, rather than their reproductive mechanism (Figure  
243 3). All but one of the core meiosis genes were detected in *Microctonus* genomes, with only  
244 DMC1 being absent (Figure 3), though DMC1 is also absent in *Drosophila melanogaster* and

245 the majority of Hymenopteran species assayed regardless of their reproductive mechanism,  
 246 implying it is dispensable in meiosis in these species (Tvedte et al., 2017).  
 247

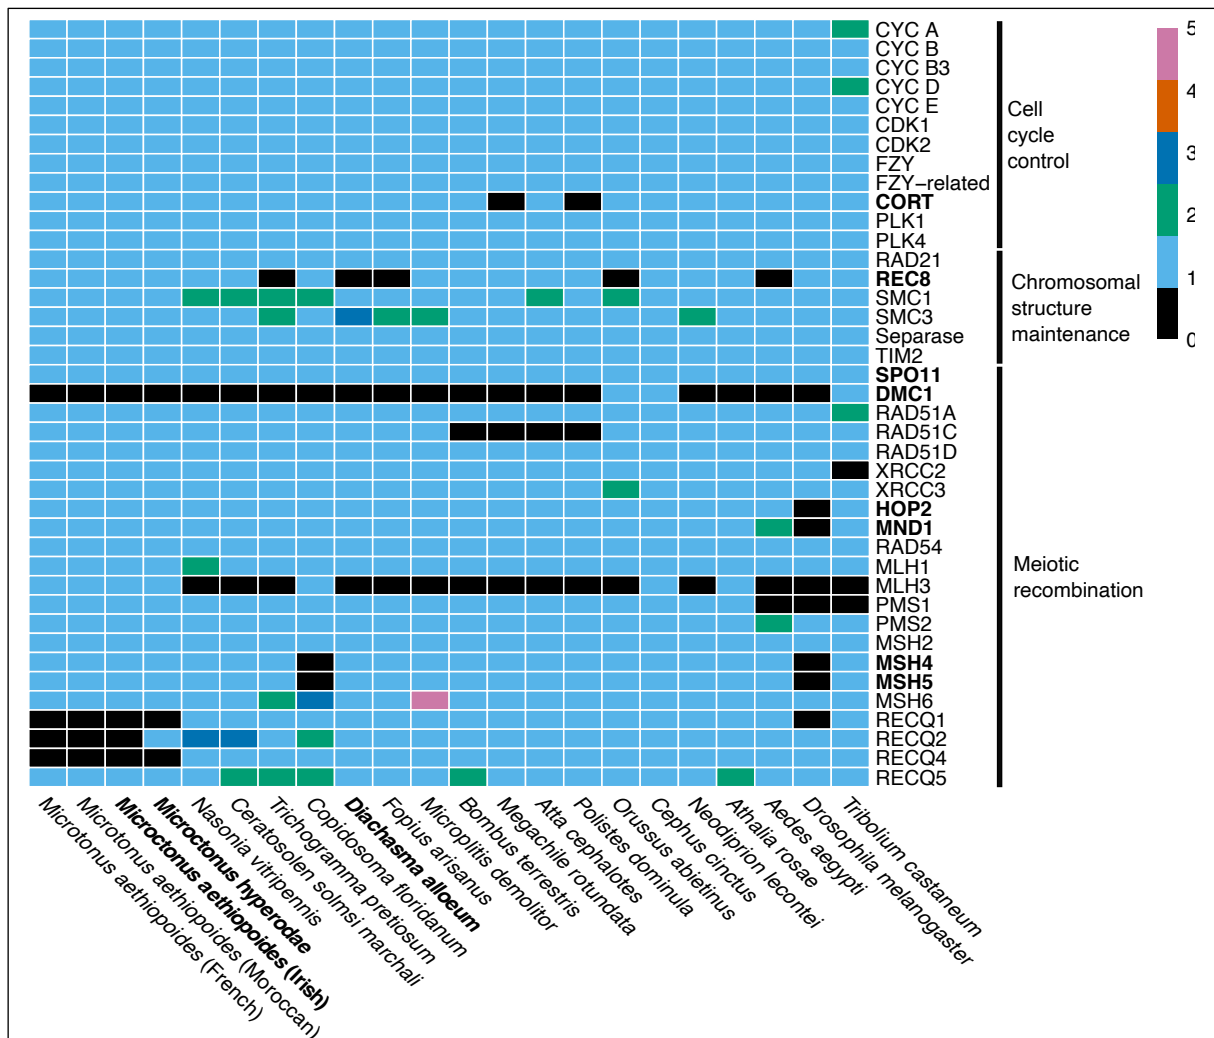

**Figure 3** A heatmap displaying the meiosis gene inventory of *Microctonus*, compared to results in other Hymenoptera, Diptera and Coleoptera from Tvedte et al (2017). Colours in heatmap indicate the absence or presence (and gene number) of each meiosis gene. Core meiosis genes, which are specific to meiosis, and asexual Hymenoptera species are indicated in bold.

248  
 249 There is variation in the presence and absence of RECQ genes in the *Microctonus*. RECQ1  
 250 and RECQ4 were not identified in the peptide databases of any *Microctonus*, and RECQ2 was  
 251 only detected in *M. hyperodae* (Figure 3), though this could be due to gene prediction for *M.*

252 *hyperodae* using RNA-seq data from ovaries while *M. aethiopoulos* prediction did not. The  
253 RECQ group of proteins are DNA helicases that unwind double-stranded DNA for DNA repair,  
254 recombination, and transcription. Some of the RECQ orthologs are required to protect the  
255 genome against deleterious mutations (Rezazadeh, 2012). RECQ1 interacts with parts of the  
256 DNA mismatch repair pathway during recombination in humans (Doherty et al., 2005).  
257 RECQ4 co-localises with Rad51 after the induction of DNA double-strand breaks, with a  
258 possible role in DNA double-strand breakthrough homologous recombination (Petkovic et  
259 al., 2005). RECQ2 mutants in *S. cerevisiae* have suppressed non-crossover recombinants  
260 indicating a role in mediating recombination product formation (Petkovic et al., 2005). The  
261 absence of RECQ genes in *Microctonus* genomes may influence rates of recombination  
262 leading to lower genetic diversity, particularly in those that reproduce asexually, and may  
263 explain the lack of recombination previously observed in *Microctonus hyperodae* at two  
264 allozyme loci (Iline & Phillips, 2004).

265

266 Having surveyed the meiosis toolkit genes and examined reads for the presence of  
267 endosymbionts that manipulate reproductive mechanisms, we have found no clear evidence  
268 for a cause of asexual reproduction in *M. hyperodae* or *M. aethiopoulos* Irish. The  
269 conservation of most meiosis toolkit genes, particularly all core meiosis genes aside from  
270 DMC1 (Figure 3), indicates that asexual reproduction in *M. aethiopoulos* Irish and *M.*  
271 *hyperodae* likely uses automixis involving meiosis. This is supported by the detection of  
272 MND1 expression in the asexual Irish *M. aethiopoulos* ovaries (Supplementary Figure 2), and  
273 is consistent with the detection of meiosis core gene expression in *M. hyperodae* ovaries

274 (Inwood et al., 2023), implying that these parasitoids have retained the potential to  
275 reproduce sexually.

276

277 Heterozygosity rates in these *Microctonus* also do not segregate based on their reproductive  
278 mechanisms, with Genomescope Kmer estimates of 0.59%, 0.25%, 0.34% and 0.41% for *M.*  
279 *hyperodae* and the Irish, French, and Moroccan *M. aethiopoidea*. The formation of gametes  
280 via automixis can involve various strategies to restore diploidy, which have varied effects on  
281 rates of heterozygosity, from elimination to retention of all heterozygosity (Pearcy et al.,  
282 2006). Previous detection of heterozygosity in *M. hyperodae* (Iline & Phillips, 2004) is  
283 supported by these results, with heterozygosity also detected in the asexual Irish *M.*  
284 *aethiopoidea*, indicating that if parthenogenesis is automictic in these parasitoids it relies on  
285 a strategy that retains at least some heterozygosity. One such mechanism for this is  
286 premeiotic duplication which retains all heterozygosity, with observed upregulation of genes  
287 involved in endoreduplication in *M. hyperodae* ovaries providing a putative mechanism for  
288 this (Inwood et al., 2023). Investigation of where heterozygous sites occur along  
289 chromosomes in the Hi-C scaffolded *Microctonus* genome assemblies could assist in  
290 determining this mechanism, as was used in investigation of parthenogenesis in the clonal  
291 raider ant *Cerapachys biroi* (Oxley et al., 2014).

292

## 293 Identification of an infectious virus involved in biocontrol

294

295 A reciprocal BlastP search of predicted proteins from the *Microctonus* genomes was  
296 performed to investigate viral gene content in *Microctonus* genomes, which identified



297 significant viral hits in all assemblies (Supplementary table 2). The number of RNA virus hits  
298 was low as expected, given that DNA sequencing should not detect RNA viruses unless their  
299 genes are integrated into the genome. A variable number of DNA virus hits were detected in  
300 *M. hyperodae* (across 20 contigs) as well in the Moroccan and French strains of *M.*  
301 *aethiopoides* (across five and three contigs) (Supplementary Figure 3). All hits came from  
302 viral families known to infect insects, with most *M. aethiopoides* hits to *Polydnaviridae* and  
303 most *M. hyperodae* hits to *Baculoviridae* and unclassified DNA viruses (Supplementary  
304 Figure 4).

305

306 To investigate whether viral genes detected in these assemblies are endogenous (and  
307 putatively involved in PDV particle/VLP production) or exogenous, several approaches were  
308 taken. First the presence of eukaryotic genes on the same contigs as viral genes was  
309 investigated using BlastP and BUSCO. This revealed no strong evidence of eukaryotic genes  
310 on viral contigs in *M. hyperodae*, in which no virus-like particles had previously been  
311 detected (Barratt, et al., 1999), and recent transcriptome analysis revealed no clear signs of  
312 PDVs or other endogenous viral elements with high expression in venom or ovaries (Inwood  
313 et al., 2023). *M. hyperodae* was the only parasitoid with a Hi-C genome and DNA virus hit,  
314 with none present on the Hi-C scaffolds. This is despite Hi-C data having coverage for the  
315 viral contigs, with 0.15% of Hi-C interactions involving viral contigs, and 83.8% of these viral

316 interactions being between two viral contigs, indicating that their exclusion from the main  
317 Hi-C scaffolds was not due to these contigs not being sequenced.

318

319 Presence of eukaryotic genes on contigs with DNA virus hits was also examined in French  
320 and Moroccan *M. aethioides*, with no DNA virus hits for the Irish strain. For French *M.*  
321 *aethioides* 10 out of 16 genes on these contigs had eukaryotic hits, with all of these  
322 belonging to the Braconidae. Similarly, for Moroccan *M. aethioides* 11 of 21 genes had  
323 eukaryotic hits, seven of which were to Braconidae, providing some evidence that these viral  
324 contigs may be endogenous. No BUSCO genes were present on the contigs with DNA virus  
325 hits for the Moroccan or French assemblies, which would have provided stronger evidence  
326 of whether DNA virus genes are endogenous or otherwise. By contrast, BUSCO genes were  
327 present on all contigs with RNA virus hits, indicating they are endogenous as expected. VLPs  
328 had previously been detected in the Moroccan *M. aethioides*, but not in the limited  
329 number of French or Irish samples collected (Barratt et al., 2006; Barratt, Evans, et al., 1999).

330

331 The GC sequence content and sequencing depth of viral contigs was compared to Hi-C  
332 chromosome scaffolds for *M. hyperodae* and to contigs with BUSCO genes for *M.*  
333 *aethioides* strains to provide further evidence of whether viral contigs were exogenous or  
334 endogenous (Supplementary Figure 4). There is a significant difference between both the GC  
335 content and sequencing depth of viral contigs and Hi-C scaffolds in *M. hyperodae* (GC: mean  
336 34.0% compared to 29.5%,  $p = 6.7E-08$ , depth: mean 258 compared to 175,  $p = 1.6E-03$ ),  
337 with this depth result still significant when two high outlier contigs (scaffolds 90 and 995,  
338 mean depth of 879) are removed (mean 189 compared to 175,  $p = 1.3E-02$ ) (Supplementary

339 Figure 4). There was also a significant difference in GC content and depth between BUSCO  
340 and viral contigs in *M. aethioides* French (GC: mean 35.1% compared to 28.9%,  $p = 1.9E-$   
341  $02$ , depth: mean 172 compared to 281,  $p = 7.4E- 03$ ) while in *M. aethioides* Moroccan  
342 there was no significant difference in either metric (GC: mean 32.3% compared to 29.0%,  $p =$   
343  $0.12$ , depth: mean 548 compared to 194,  $p = 0.88$ ) even when the high depth outlying contig  
344 in *M. aethioides* Moroccan (depth = 1822), which contains the only *Baculoviridae*,  
345 unclassified DNA virus and hemoflagellate parasite hits, was analysed in a separate group ( $p$   
346  $\geq 0.50$ ) (Supplementary Figure 4).

347

348 Only *M. aethioides* Moroccan returned non-significant results for both comparisons  
349 (Supplementary Figure 4) providing more evidence supporting that these contigs may be  
350 endogenous, with this strain previously demonstrated to have VLPs in their ovaries (Barratt  
351 et al., 1999, 2006). No analysis has been done on what these particles contain beyond an  
352 inability to extract DNA from them, so it is unknown whether they have a viral origin, though  
353 these identified viral genes in *M. aethioides* Moroccan are candidates for involvement in  
354 VLP production. A more contiguous genome assembly would be required to confirm  
355 whether they are exogenous or endogenous. The Hi-C data, GC and sequencing depth

356 analyses do however provide strong evidence that the viral contigs in *M. hyperodae* are  
357 derived from an exogenous viral infection.

358

359 *M. hyperodae* metagenome assembly.

360

361 Given these results, efforts were therefore made to assemble a complete genome for the  
362 exogenous virus in *M. hyperodae*. Meta-genomic assembly was performed using MinION  
363 long reads, which were generated from a sample that preliminary Illumina sequencing had  
364 confirmed infection status with high viral coverage (mean viral depth of 19x, compared to  
365 mean Hi-C scaffold depth of 9x). This generated 354,749 MinION reads with a mean 65x  
366 depth of the viral contigs and 19x depth of the Hi-C scaffolds. All reads that mapped to the  
367 *M. hyperodae* Hi-C scaffolds were removed, retaining 44,388 reads with a mean length of  
368 7305 bp.

369

370 Metagenomic assembly from these filtered reads generated 933 contigs, 41 of which were  
371 circular assemblies. viralFlye classified one circular contig, six linear contigs and three  
372 component contigs with branching paths, as complete viral assemblies. Given the viral BlastP  
373 hits to *Baculoviridae* and an unclassified DNA virus, *Leptopilina boulardi filamentous virus*  
374 (LbFV), both of which have a circular dsDNA genome, it was expected that the MhFV  
375 genome would also be circular. A BlastN search of the complete circular viral contig found  
376 significant hits to 18 of the 20 viral contigs (lacking hits to the two high depth contigs  
377 excluded from analysis earlier) identified in the *M. hyperodae* genome assembly, indicating  
378 that this complete assembly is for the exogenous viral infection identified. Based on the

379 number of BlastP hits to LbFV and later phylogenetic analysis, we provisionally name this  
380 virus *Microctonus hyperodae* filamentous virus (MhFV).

381

382 **Complete genome assembly of *M. hyperodae* filamentous virus.**

383

384 Illumina read coverage for this complete MhFV assembly was variable (Figure 4), with a  
385 maximum of 494x, and a mean of 147x. Illumina short read coverage dropped to 0x in 44  
386 regions, ranging in length from 1 bp to 370 bp, with a mean of 88 bp and total length of 3860  
387 bp. Nanopore read coverage was less variable (with a maximum of 168x and a mean of 69x)  
388 and didn't drop below 4x (Figure 4). The MhFV genome assembly is 163 Kb long, with a GC  
389 content of 37.8% and has comparable characteristics compared to other nuclear arthropod-  
390 specific large dsDNA viruses (NALDVs) (Supplementary Table 3).

391

392 There are 158 predicted genes in the MhFV genome, all of which are complete and 88.6% of  
393 which start with a methionine (minimum amino acid length = 34, maximum = 1652, mean =  
394 286.7). Of the 158 predicted genes, there were significant BlastP hits or Pfam protein  
395 domains for 86, leaving 72 genes without any significant homology to indicate potential  
396 function (Supplementary Table 4). The most common virus hits were to *Leptopilina boulardi*  
397 filamentous virus (LBFV) with 23 hits, followed by *Drosophila*-associated filamentous virus  
398 (DaFV, eight hits) and *Glossina pallidipes* salivary gland hypertrophy virus (five hits)  
399 (Supplementary Table 4). The predicted genes contain several known viral gene families,

400 such as *per os* infectivity factors, late expression factors, five KILA-N domain-containing  
401 genes, and 17 BRO genes (Supplementary Table 4).

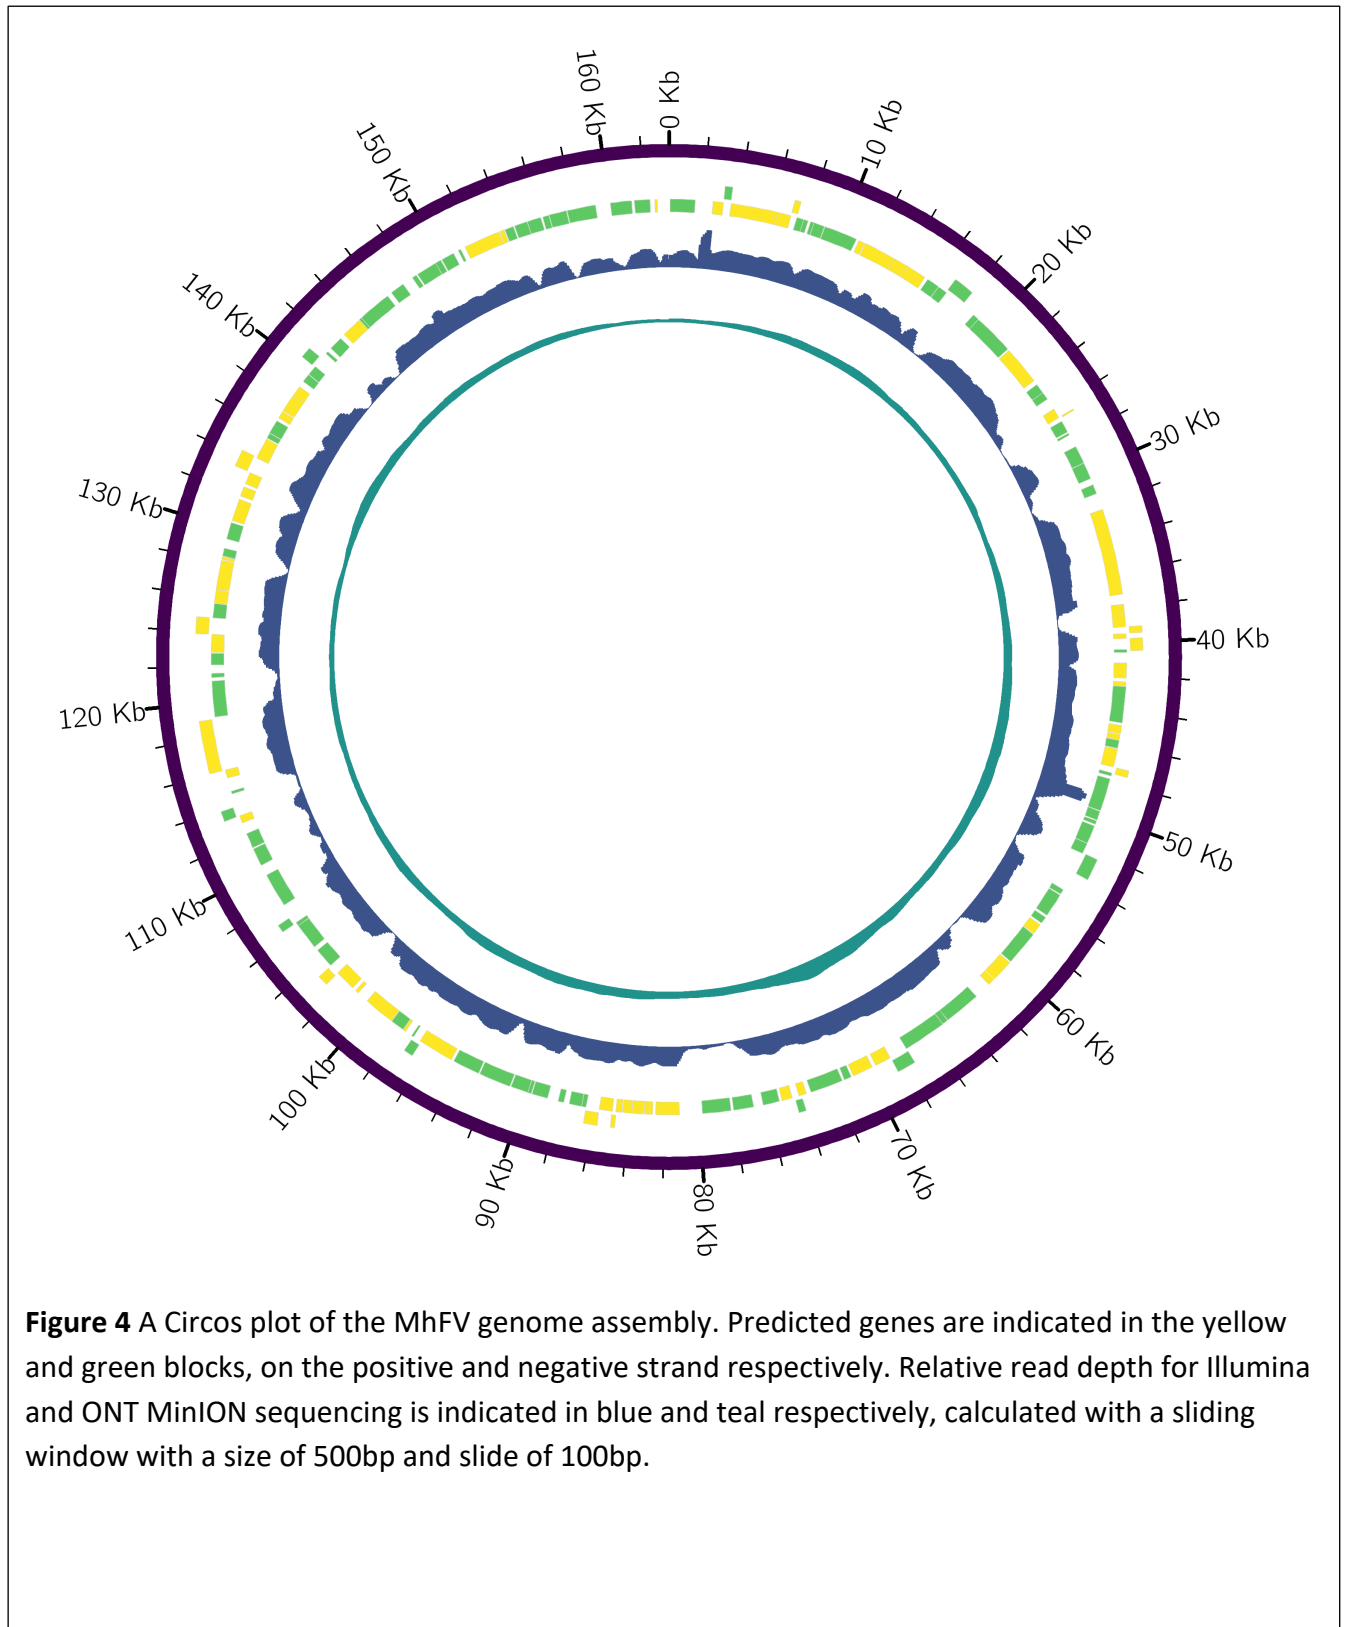

402

403 While there were 27 hits to bacteria and eukaryotes, an investigation of the full list of Blast  
404 hits revealed 11 of these genes also had other viral hits, suggesting potential viral  
405 contamination in the assemblies that the best hits came from, rather than there being a  
406 putative non-viral origin for all 27 genes. Three genes had only non-viral BlastP hits,  
407 including two inhibitor of apoptosis (IAP) genes and a lytic polysaccharide monooxygenase  
408 (Supplementary Table 4). ORF32 and ORF152 are both annotated as IAPs (Supplementary  
409 Table 4), which are often found in NALDVs and thought to manipulate the host immune  
410 system by suppressing apoptosis of infected cells (Crook et al., 1993; Lu & Miller, 1995). IAP  
411 genes were also present in the LbFV genome and had a eukaryotic origin (Lepetit et al.,  
412 2016). ORF116 and ORF133 are both annotated as lytic polysaccharide monooxygenases  
413 (Supplementary Table 4), with at least 97% of hits for both genes from bacterial species.  
414 While none of these hits were viral, many viruses in the families Poxviridae and  
415 Baculoviridae contain genes named Fusolin and GP37, which belong to the lytic  
416 polysaccharide monooxygenase family (Levasseur et al., 2013). These act to disrupt the  
417 peritrophic matrix of insect hosts and facilitate viral infection (Chiu et al., 2015; Phanis et al.,  
418 1999). ORF67 was annotated as containing a JmJc-domain (Supplementary Table 4), and  
419 while it did have viral hits with one from DaFV and two from different LbFV JmJc-domain  
420 containing proteins, there were no other viral hits and 497 non-viral hits. Phylogenetic  
421 analysis of the JmJc-domain genes in LbFV indicated they were likely acquired via horizontal

422 transfer from an ancestral host parasitoid (Lepetit et al., 2016). JmJc-containing proteins are  
423 a class of demethylase enzymes involved in transcription regulation (Klose et al., 2006).

424

## 425 Phylogenetic position of MhFV.

426

427 Recent work identifying endogenous viral elements (EVEs) in parasitoid genomes has  
428 identified 12 core genes (*DNApol*, *helicase*, *lef-5*, *lef-8*, *lef-9*, *p33*, *pif-0*, *pif-1*, *pif-2*, *pif-3*, *pif-*  
429 *5* and *ac81*) conserved in many NALDVs, and EVEs derived from NALDVs (Burke et al., 2021).  
430 Of these core genes, ten were identified in the LbFV genome, missing both *pif-3* and *lef-5*. A  
431 BlastP search of gene predictions from the incomplete assembly of DaFV only identified four  
432 of the core genes. The MhFV genome has predicted genes with significant BlastP and/or  
433 protein domain hits to 11 of these core genes. MhFV is missing only *lef-5*, which is the core  
434 gene found in the least number of NALDVs due to its short length (Burke et al., 2021).

435

436 Phylogenetic analysis was carried out using protein sequences of the 12 core genes, from all  
437 NALDVs used in the analysis by Burke et al., (2021). EVEs derived from NALDVs were  
438 excluded, as were the LbFV-like viral contigs identified in that analysis that may have an  
439 endogenous origin, as MhFV is an active viral infection rather than an EVE. The resulting  
440 phylogeny is globally well resolved, and all characterized viral families were monophyletic  
441 displaying expected relationships (Figure 5) (Burke et al., 2021). Despite sharing similar  
442 names, *Apis mellifera* filamentous virus and the LbFV-like viruses are separated on the  
443 phylogeny, which is the expected result. The placement of LbFV outside of characterized  
444 NALDV families is the same result found in other analyses (Burke et al., 2021; Kawato et al.,





449 MhFV is likely a member of this uncharacterized LbFV-like virus family, though electron  
450 microscopy would be required to confirm whether MhFV also has filamentous viral particles.

451

452 Manual inspection of mapped Illumina reads revealed the presence of many single  
453 nucleotide polymorphisms (SNPs) in the MhFV genome. This variation is likely a result of  
454 Illumina sequencing having been performed on a sample with five pooled *M. hyperodae*  
455 individuals, as the variability in the MinION reads derived from a single individual is much  
456 lower. Variant calling and filtering revealed 1674 SNPs in the MhFV genome, compared to  
457 only two in the 111 kb LbFV genome assembly, which was also assembled from a pooled  
458 sample (Lepetit et al., 2016). This indicates a relatively high level of variation in the MhFV  
459 genome that future population genetics research on *M. hyperodae* should also consider.

460

#### 461 MhFV expression in *M. hyperodae* tissues

462 A BlastN search of the MhFV gene predictions against a previous *de novo* transcriptome  
463 assembly for *M. hyperodae* (Inwood et al., 2023) revealed 79 transcripts with significant hits  
464 to 89 MhFV predicted genes. When this RNA-seq dataset is re-examined with the *M.*  
465 *hyperodae* and MhFV genomes, mean TPM values for each predicted MhFV gene in adult  
466 tissue samples range from 1.23 (ORF80) to 0.00, while mean TPM in pupa samples ranges  
467 from 16.48 (ORF125) to 0.00. The highest mean TPM value for each adult tissue is 3.12 in the  
468 abdomen (ORF156), 1.44 in the ovary (ORF88), 1.09 in the thorax (ORF80), 0.64 in the venom  
469 gland (ORF125) and 0.31 in the head (ORF156). This data provides transcriptomic support for  
470 MhFV infection in *M. hyperodae*, revealing levels of expression are relatively low in adult  
471 tissue samples, though this may have been impacted by the use of poly(A) enrichment

472 during library preparation. Differential gene expression analysis revealed 12 MhFV genes  
473 with expression patterns significantly influenced by tissue type. These genes had the highest  
474 expression in abdomen samples (Supplementary Figure 5), which suggests future efforts to  
475 image MhFV particles should focus on tissues in the abdomen.

476

## 477 Implications of MhFV Infection

478

479 MhFV has 23 genes with significant BlastP hits to LbFV, and phylogenetic analysis indicates it  
480 is in the same uncharacterized viral family. LbFV infects *Leptopilina boulardi* parasitoids with  
481 prevalence varying between 0% to 95% depending on parasitoid density (Patot et al., 2010),  
482 and manipulates *L. boulardi* oviposition behaviour, significantly increasing superparasitism of  
483 their *Drosophila* host to facilitate horizontal transmission of the virus (Varaldi et al., 2005,  
484 2006). This superparasitism causes decreased overall parasitism rates due to egg wastage,  
485 and infected *L. boulardi* are outcompeted by the related parasitoid *L. heterotoma* (Patot et  
486 al., 2012). LbFV infection also causes an increase in developmental time and egg load  
487 (thought to offset egg wastage from superparasitism), and a decrease in female tibia length.  
488 *L. boulardi* eggs infected with LbFV are also encapsulated significantly less by *Drosophila*,  
489 and so this infection may also assist in the avoidance of the host immune system during  
490 parasitism (Martinez et al., 2012). This host manipulation could provide another mechanism  
491 by which *M. hyperodae* avoids encapsulation of their eggs by *L. bonariensis* (Tomasetto et  
492 al., 2017), alongside identified venom components (Inwood et al., 2023), and therefore the  
493 potential for MhFV transmission during parasitism should be investigated in future. The

494 possibility for behavioural manipulation of *M. hyperodae* by MhFV should also be  
495 considered, but not assumed.

496

497 Future research into this biocontrol system should consider the significant impact that the  
498 MhFV infection may play in *M. hyperodae* and biocontrol of ASW. MhFV may play a role in  
499 the premature mortality phenomenon observed in ASW exposed to *M. hyperodae* (Goldson,  
500 et al. 1993; Goldson, et al 2004; Vereijssen et al., 2011), a hypothesis supported by the cause  
501 of toxicity during interrupted parasitism attempts with the parasitoid *A. tabida* being  
502 identified as viral particles (Furihata et al., 2016). Future work should therefore investigate  
503 whether MhFV is transmitted to ASW during successful parasitism and failed parasitism  
504 attempts.

505

506 Determining the prevalence of MhFV in *M. hyperodae* populations around NZ is also of  
507 interest, to see if it is varied between locations with different declines in parasitism rates. If  
508 populations without MhFV were identified, these could then be used to determine the  
509 physiological effects of MhFV infection on *M. hyperodae*. Examining historical *M. hyperodae*  
510 samples, reared and stored from lines imported into NZ from South America before release  
511 for biocontrol, should provide evidence of whether MhFV was brought into NZ from their  
512 home range, as well as allowing for investigation of whether the prevalence and/or viral load  
513 differs in the historical and contemporary samples. Finally, given the large number of  
514 variants detected in the MhFV genome with pooled sequencing of five individuals, genetic  
515 variation in the virus genome should be considered alongside that in the parasitoid genome,

516 both in comparisons between contemporary locations with different rates of biocontrol  
517 decline, and compared to historical samples.

518

## 519 Conclusions

520

521 We generated high quality genomes for the parasitoid wasps *M. hyperodae* and *M.*  
522 *aethiopoides*, which are used as biocontrol agents in NZ, and have investigated aspects of  
523 their divergent biology. We have shown that core meiosis genes are conserved in both  
524 sexual and asexual *Microctonus* genomes, consistent with previous work implying that  
525 asexual reproduction is automictic, involving meiosis, with the potential for sexual  
526 reproduction retained. By investigating viral gene content in the genomes, we have also  
527 identified candidate genes in the *M. aethiopoides* Moroccan genome that could be involved  
528 in VLP production, as well as a novel virus infecting *M. hyperodae*, for which a complete  
529 genome was assembled. These resources will be invaluable for future work investigating

530 genomic factors that influence success or failure of *Microctonus*-based biocontrol in New  
531 Zealand, and for ongoing investigation of the *M. hyperodae* biocontrol decline.

532

## 533 Methods

534

### 535 *Microctonus* spp. samples & sequencing

536

537 *Microctonus* spp. samples were supplied by AgResearch, Lincoln, consisting of pools of five  
538 *M. hyperodae*, five Moroccan and 10 French *M. aethiopoides* frozen in ethanol as well as 23  
539 live Irish *M. aethiopoides*. DNA was extracted from these samples using a DNeasy kit  
540 (Qiagen), and prepared for sequencing using the TruSeq DNA PCR-Free platform. Samples  
541 were sequenced on an Illumina HiSeq 2500 by the Otago University Genomics Facility  
542 (<https://www.otago.ac.nz/genomics/index.html>), generating 26, 28, 24, and 35 Gb of 250 bp  
543 paired-end reads respectively.

544

### 545 Genome assembly and scaffolding

546

547 The BBTools v37.57 suite BBDuk program (<http://jgi.doe.gov/data-and-tools/bb-tools/>) was  
548 used to trim and decontaminate reads, using default settings for adapter and quality  
549 trimming, while also removing the last 5 bp from each read. Kraken2 v2.0.7 was used to  
550 taxonomically classify reads against the Kraken standard database (downloaded 17th  
551 September 2018) (Wood et al., 2019). Kmer counting was performed using KMC v3.1.1

552 (Kokot et al., 2017) with a kmer length of 21, for Genomescope2 analysis on the web-based  
553 interface (Ranallo-Benavidez et al., 2020).

554

555 Meraculous v2.2.5 was used for genome assembly (Chapman et al., 2011), trialling a range of  
556 Kmer values, with both trimmed reads and reads normalised by BBNorm to a maximum  
557 coverage of 50 and minimum of 5. A range of parameters (including N50 and L50, as  
558 determined by the BBTools v38.0 stats wrapper), comparison to estimated genome sizes,  
559 and BUSCO v5.4.3 analysis (Simão et al., 2015) were used to determine the best parameters  
560 for each genome. Final Kmer values for assembly were as follows: 79 for *M. aethioides*  
561 French and Irish, 71 for *M. aethioides* Moroccan, and 41 for *M. hyperodae*. Normalised  
562 reads were used for the French and Moroccan assemblies, and non-normalised for French  
563 and *M. hyperodae*. Assembly was run in haploid mode for Irish, and diploid mode for French,  
564 Moroccan and *M. hyperodae* assemblies.

565

566 Draft genomes for *M. aethioides* Irish and *M. hyperodae* were scaffolded by Phase  
567 Genomics using Hi-C data generated from pools of 10 individuals. Phase Genomics Proximo  
568 Hi-C 2.0 kit, a commercially available version of the Hi-C protocol (Lieberman-Aiden et al.,  
569 2009) was used to generate chromatin conformation capture data. These data were then  
570 used with the Phase Genomics Proximo Hi-C genome scaffolding platform to create  
571 chromosome scale scaffolds, as described in Bickhart et al. (2017). BUSCO v5.4.3, and the  
572 BBTools v38.0 stats wrapper were then run on Hi-C scaffolded assemblies, with exogenous  
573 viral contigs (identification detailed below) removed from the *M. hyperodae* assembly. To  
574 investigate genome synteny between the *M. hyperodae* and *M. aethioides* Hi-C

575 assemblies, MCScanX was used to identify the 2000 best linkage bundles (Wang et al., 2012),  
576 which were then visualised using Circos v0.69-9 (Krzywinski et al., 2009).

577

## 578 Genome Annotations

579

580 Gene prediction was performed using Funannotate v1.5.0-12dd8c7 (Palmer & Stajich, 2019).

581 Repeats were identified using RepeatModeler v1.0.11 ([github.com/Dfam-](https://github.com/Dfam-consortium/RepeatModeler)

582 [consortium/RepeatModeler](https://github.com/Dfam-consortium/RepeatModeler)) and RepeatMasker v1.5.0

583 ([repeatmasker.org/RMDownload.html](https://repeatmasker.org/RMDownload.html)) via the Funannotate pipeline. The Funannotate

584 model was then trained using Funannotate train on the masked genome assembly using

585 *Microctonus hyperodae* or *Microctonus aethiopoidea* sequences depending on the species of

586 interest. Augustus v 3.3.1 was iteratively trained (Stanke et al., 2008) and used as input for

587 Funannotate predict to predict genes, using the Hymenoptera BUSCO and optimized

588 Augustus settings. Funannotate update was subsequently used to upgrade the annotation.

589 Further annotation was performed with Funannotate using InterProScan 5.32-71.0 (Mitchell

590 et al., 2019). To provide additional data for *M. hyperodae* gene prediction, RNA was

591 extracted from two pools of ovaries using a hybrid of Trizol (Ambion) and RNeasy mini kit

592 (Qiagen) methods. RNA was prepared for using the TruSeq Stranded mRNA platform, and

593 sequenced on an Illumina HiSeq 2500 by Otago Genomics Facility



594 (<https://www.otago.ac.nz/genomics/index.html>) to generate 250 bp paired-end reads. RNA-  
595 seq data was not available for *M. aethioides* gene prediction.

596

597 To estimate the divergence between *Microctonus* species, Orthofinder v2.3.12 (Emms &  
598 Kelly, 2015, 2019) was run in multiple sequence alignment mode, using the diamond search  
599 engine and maft, on the genomes of 25 Hymenoptera species and *Drosophila melanogaster*,  
600 to produce an ultrametric species tree from peptide databases. The divergence of  
601 *Acromyrmex echinatio* and *Camponotus floridanus* of 62 MYA (Peters et al., 2017) was used  
602 to calibrate the molecular clock, with a branch length sum of 0.1101, which divided by 62  
603 MYA gave a scaling factor of 563.12. Scaling the ultrametric Orthofinder species tree in  
604 Figtree resulted in a phylogenetic tree with inferred divergence estimates, which allowed for  
605 divergence between *M. hyperodae* and *M. aethioides* to be estimated.

606

## 607 Identification of mitosis and meiosis-related Genes.

608

609 To investigate the parthenogenesis mechanism of asexual *Microctonus*, 40 genes known to  
610 play a role in meiosis and mitosis (including 8 genes with roles specific to meiosis) were  
611 collected for 15 Hymenopteran species, as well as *Aedes aegypti*, *D. melanogaster* and  
612 *Tribolium castaneum*, from the NCBI database corresponding to accessions used in a  
613 previous analysis by Tvedte et al. (2017). Fasta files were made for the genes and ortholog  
614 groups the cyclins (CYC A, CYC B, CYC B3, CYC D and CYC E), the cyclin-dependent kinases  
615 (CDK1 and CDK2), CDC20 homologs (CORT, CDC20/FZY and CDC20-like/FZY-related), the  
616 Polo-like kinases (PLK1 and PLK4), RAD21 and REC8, structural maintenance of the

617 chromosomes orthologs (SMC1 and SMC3), RAD51 orthologs (RAD51A, RAD51C, RAD51D,  
618 XRCC2 and XRCC3), heterodimers HOP2 and MND1, MutL orthologs (MLH1, MLH3, PMS1  
619 and PMS2), MutS homologs (MSH2, MSH4, MSH5 and MSH6), RECQ helicase orthologs  
620 (RECQ1, RECQ2, RECQ4 and RECQ5), RAD54, SPO11, TIM2, DMC1, and Separase.  
621  
622 Sequences for each gene and ortholog group were aligned using Muscle v3.8.13 and  
623 trimmed using TrimAl v1.2 with the strictplus trimming parameters. Gene-specific hidden  
624 Markov models (HMMs) were generated using hmmbuild from Hmmer v3.2.1 (Eddy, 2011).  
625 These HMMs were used to search the *Microctonus* peptide databases with hmmsearch,  
626 using an E-value of 1E-15. Top hits were selected and peptides retrieved using esl-sfetch  
627 from Hmmer v3.2.1. Peptide sequences for each gene were aligned using Muscle v3.8.13  
628 and trimmed using TrimAL v1.2 with the “strictplus” parameters. Phylogenetic trees were  
629 constructed for individual genes and ortholog groups using rapidnj v2.3.2 (Simonsen et al.,  
630 2008) with a bootstrap value of 1000 for genes and 1000000 for ortholog groups.

631

### 632 Hybridisation chain reaction in *Microctonus aethioides* Irish.

633

634 Parthenogenetic *Microctonus aethioides* (Irish) were reared from CRW collected from  
635 pasture in Timaru, New Zealand, with ovaries dissected from 10 wasps three days after  
636 eclosion. Ovaries were fixed, and hybridisation chain reaction (HCR) performed with an  
637 MND1 probe (with fluorophore 488) as per Inwood et al, (2023). Ovaries were stained with

638 DAPI at a 1:1000 concentration, and mounted on slides in glycerol, for imaging on an  
639 Olympus BX61 Fluoview FV100 confocal microscope with FV10-ASW 3.0 imaging software.

640

## 641 Identification of viral genes in *Microctonus* genome assemblies.

642

643 In order to identify genes with a viral origin in the *Microctonus* genome assemblies, the  
644 predicted peptide databases were searched for peptides with significant homology to viral  
645 genes using a reciprocal BlastP v2.9.0 search approach. First a BlastX v2.12.0 search was  
646 performed (with an E value of 1E-05 to minimise false-positive results) of all transcripts  
647 against the nr database downloaded on May 16<sup>th</sup>, 2021, restricted to only viral entries in the  
648 database by using TaxonKit 0.8.0 (Shen & Ren, 2021) to produce a list of all viral taxonomy  
649 identifiers at a species level or below and restricting the BlastP search to this list using the -  
650 taxidlist option. Any gene with a significant viral BlastX result was then used in a subsequent  
651 BlastP search against the whole nr database to remove those genes with better non-viral  
652 hits. Finally, any remaining genes on contigs with viral hits that did not have a viral hit were  
653 also subject to a BlastP search against the whole nr database to identify potentially  
654 eukaryotic genes on the viral contigs. The scripts used for this viral gene identification are  
655 available on Zenodo at doi: 10.5281/zenodo.7939016 using a Snakemake-managed  
656 workflow (Köster & Rahmann, 2012).

657

658 GC content and sequencing depth were compared between Hi-C scaffolds and contigs with  
659 DNA virus hits for *M. hyperodae*, and between contigs containing BUSCO hits and contigs  
660 with DNA virus hits for *M. aethiopoulos* French and Moroccan. The GC content for all contigs

661 was calculated using BBStats v38.0. To determine read depth of contigs, reads were trimmed  
662 using BBDuk v38.0 using default settings and trimq=15, and then mapped to the appropriate  
663 genome assembly using BWA v0.7.15 (Li & Durbin, 2009). SAMtools coverage v1.10-98 (Li et  
664 al., 2009) was then used to determine read mean sequencing depth of contigs. To test for  
665 statistical differences between viral and Hi-C/BUSCO contigs, a Shapiro-Wilk test was first  
666 carried out to determine whether data were normally distributed, which indicated non-  
667 parametric tests should be used. A Kruskal-Wallis rank sum test was used to identify  
668 whether there was a significant difference between groups, followed by a pairwise Wilcoxon  
669 rank sum test. All statistical tests used an alpha threshold of 0.05 as indication of a  
670 significant difference. The scripts used for these sequence characteristic comparisons are  
671 available on Zenodo at doi: 10.5281/zenodo.7939021 using a Snakemake-managed  
672 workflow.

673

## 674 Viral genome sequencing and assembly

675

676 To completely assemble a genome for the virus detected in *M. hyperodae*, some preliminary  
677 Illumina sequence data were examined to identify an *M. hyperodae* sample with high viral  
678 coverage. A library was prepared from this sample for long-read Nanopore sequencing on a  
679 MinION (Oxford Nanopore Technologies, ONT) using whole-genome amplification and  
680 genomic DNA by ligation (SQK-LSK110, ONT), and sequenced on a FLO-MIN106 flowcell  
681 (ONT). MinION reads were basecalled using Guppy v6.0.0 with the high-accuracy mode, and  
682 Porechop v.0.2.4 used to trim adapters off reads (<https://github.com/rrwick/Porechop>).  
683 Reads were mapped to the *M. hyperodae* assembly using Minimap2 v2.24 (Li, 2018), to

684 remove reads that aligned to the *M. hyperodae* Hi-C scaffolds. The scripts used for the initial  
685 base-calling and read filtering are available on Zenodo at doi: 10.5281/zenodo.7939025  
686 using a Snakemake-managed workflow.  
687  
688 Remaining reads were then used for assembly using Flye v2.9 with the metagenome mode  
689 (Kolmogorov et al., 2019, 2020), with output then subject to viralFlye v0.2 analysis (Antipov  
690 et al., 2022) to identify which contigs represented full viral genomes. A BlastN search of the  
691 only complete circular viral genome assembled revealed significant hits to all *M. hyperodae*  
692 viral contigs suspected to belong to the same virus, indicating the complete viral genome  
693 had been assembled. Medaka v1.7 (<https://github.com/nanoporetech/medaka>) and  
694 nextPolish v1.4.1 (Hu et al., 2020) were used to polish the assembled genome with long then  
695 short reads. The filtered MinION and Illumina reads were then mapped back onto the  
696 assembled, polished genome using BWA v2.24, and depth of sequencing at each loci  
697 determined using Samtools coverage v1.10-98. Gene prediction was performed using  
698 Prodigal v2.6.3 (Hyatt et al., 2010) using the metagenome mode. Predicted protein  
699 sequences were subject to a BlastP search against the nr database, retaining all significant  
700 hits and filtering results for the lowest E-value and highest bit-score. Hmmscan v3.2.1 was  
701 used against the Pfam database (Finn et al., 2014) downloaded 3<sup>rd</sup> February 2020, to identify  
702 protein domains in predicted genes, with results filtered to retain domains with an  
703 independent E-value below 5e-04. The scripts used for genome assembly and annotation are

704 available on Zenodo at doi: 10.5281/zenodo.7939027 using a Snakemake-managed  
705 workflow.

706

707 To determine the phylogenetic placement of *M. hyperodae* virus 1, an approach similar to  
708 that used by Burke et al., (2021) was used. This work had identified 12 core genes (*DNApol*,  
709 *helicase*, *lef-5*, *lef-8*, *lef-9*, *p33*, *pif-0*, *pif-1*, *pif-2*, *pif-3*, *pif-5* and *ac81*) conserved in NALDVs.  
710 All accessions for exogenous viruses used in their phylogenetic analysis were used, and  
711 annotations from BlastP and HMMscan were used to identify these genes in the assembled  
712 *M. hyperodae* virus genome. To include *Drosophila*-associated filamentous virus (DaFV) in  
713 this phylogeny, a BlastP search was performed using the gene predictions available to  
714 identify DaFV genes to include in the analysis. Genes and their accessions are detailed in  
715 supplementary table 1.

716

717 Muscle v3.7 was used to align gene sequences separately, and alignments then  
718 concatenated with FASconCAT-G v1.05 (Kück & Longo, 2014). The concatenated alignment  
719 was trimmed with default parameters and a gap threshold of 0.6 by TrimAl v1.2. A maximum  
720 likelihood phylogeny was constructed for the concatenated alignment using RAxML-NG  
721 v1.0.2, with a Blosum62 model and 1000 bootstrap replicates. The phylogenetic tree was  
722 drawn using Interactive Tree of Life (Letunic & Bork, 2021), rooted at the midpoint,

723 displaying bootstrap values above 50%. The scripts used for these analyses are available on  
724 Zenodo at doi: 10.5281/zenodo.7939029 using a Snakemake-managed workflow.

725

726 To investigate the presence of single nucleotide polymorphisms (SNPs) in the assembled  
727 virus genome, trimmed reads were mapped to the *M. hyperodae* and virus genomes  
728 concatenated into a single file, using BWA v2.24. Bam files were sorted using Samtools  
729 v1.10.2, duplicate reads marked with GATK v4.3.0 MarkDuplicates (McKenna et al., 2010)  
730 read groups added using AddOrReplaceReadGroups from the Picard tool v2.27.5  
731 (<https://github.com/broadinstitute/picard>), and resulting bam files indexed with samtools  
732 v1.10.2. The bam file was subset to retain only the virus genome, before haplotype calling  
733 was performed with GATK v4.3.0 HaplotypeCaller, with ploidy set to five (for a haploid  
734 genome with five pooled samples), and variant calling then performed with GenotypeGVCFs.  
735 Variants were filtered to retain only SNPs which passed GATK hard-filtering metric  
736 recommendations of  $QD < 2$ ,  $QUAL < 30$ ,  $SOR > 3$ ,  $FS > 60$ ,  $MQ < 40$ ,  $MQRankSum < -12.5$ ,  
737  $ReadPosRankSum < -8$ , with a minor allele frequency of 0.1. The scripts for virus variant  
738 calling are available on Zenodo at doi: 10.5281/zenodo.7939033 using a Snakemake-  
739 managed workflow.

740

741 To investigate gene expression support for the virus infection in *M. hyperodae*, RNA-seq data  
742 from a previous publication (Inwood et al., 2023) was used (NCBI SRA accession  
743 PRJNA841753). Reads were trimmed and quasi-mapped as per Inwood et al. (2023) against  
744 the *M. hyperodae* and virus predicted genes concatenated into one file. DESeq2 v1.34 (Love  
745 et al., 2014) was used to create the DESeqDataSet (DDS) object, by importing Salmon output

746 files using tximport v1.22.0 (Soneson et al., 2016) in R v4.1.3 (R Development Core Team,  
747 2020), with size factors estimated on the concatenated DDS file. The DDS file was then split  
748 into separate objects for *M. hyperodae* and MhFV, and DESeq2 then used to perform a  
749 likelihood ratio test (LRT) on the virus DDS file with the design ~Flowcell+Tissue, to control  
750 for sequencing runs on different flow cells and test for the influence of tissue on viral gene  
751 expression. Differentially expressed genes (DEGs) were identified by filtering DESeq2 results  
752 with the arbitrary alpha threshold value of 0.05 for all analyses. A heatmap of viral gene  
753 expression was generated using VST normalized data with pheatmap v1.0.12 (Kolde, 2019).  
754 The scripts used for this analysis are available on Zenodo at doi: 10.5281/zenodo.7939037  
755 using a Snakemake managed workflow.

## 756 Declarations

757

### 758 Ethics approval and consent to participate

759 Not applicable.

760

### 761 Consent for publication

762 Not applicable.

763

### 764 Availability of data and materials

765 Raw Illumina sequence data, genome assemblies and gene predictions for *Microctonus*  
766 wasps are available at the National Center for Biotechnology Information (NCBI) Sequence  
767 Read Archive (SRA) and Whole Genome Shotgun (WGS) databases, under accession  
768 PRJNA930586, with the Hi-C scaffolded assemblies submitted for *M. aethiopoidea* Irish and  
769 *M. hyperodae*, with the latter having identified MhFV contigs removed prior to submission.  
770 The genome and annotation for *Microctonus hyperodae* filamentous virus is available at  
771 Genbank with the accession number OQ439926. Scripts used for analyses are available as  
772 detailed in the methods section.

773



## 774 Competing Interests

775 The authors report no competing interests.

776

## 777 Funding

778 This work was funded by a New Zealand Ministry of Business Innovation and Employment  
779 Endeavour grant to PKD, funding from the Bioprotection Research Centre (Project 2), and  
780 Bioprotection Aotearoa (Project 2.2), both Royal Society of New Zealand funded Centres of  
781 Research Excellence.

782

## 783 Author's contributions

784 SNI; Data generation, bioinformatics, manuscript drafting,  
785 JS; Data generation, bioinformatics, manuscript drafting,  
786 JG; bioinformatics  
787 TWH; bioinformatics  
788 SG; Sample collection and curation  
789 PKD; Funding, project conception, supervision, manuscript drafting.

790

## 791 Acknowledgements

792 The authors would like to thank Mark McNeill for providing samples and Petra Dearden for  
793 proofreading this manuscript.

794

## 795 Legends

796

797 **Figure 1** Host target and reproductive mechanisms of *Microctonus* wasps used as biocontrol  
798 agents in New Zealand.

799

800 **Figure 2** Hi-C interaction maps for A) *M. aethiopoidea* Irish and B) *M. hyperodae* displaying  
801 chromosome scaffolds, and C) a Circos plot displaying chromosomal synteny between both  
802 Hi-C assemblies.

803

804

805 **Figure 3** A heatmap displaying the meiosis gene inventory of *Microctonus*, compared to  
806 results in other Hymenoptera, Diptera and Coleoptera from Tvedte et al (2017). Colours in  
807 heatmap indicate the absence or presence (and gene number) of each meiosis gene. Core  
808 meiosis genes, which are specific to meiosis, and asexual Hymenoptera species are indicated  
809 in bold.

810

811 **Figure 4** A Circos plot of the MhFV genome assembly. Predicted genes are indicated in the  
812 yellow and green blocks, on the positive and negative strand respectively. Relative read

813 depth for Illumina and ONT MinION sequencing is indicated in blue and teal respectively,  
814 calculated with a sliding window with a size of 500bp and slide of 100bp.

815

816 **Figure 5** Phylogenetic analysis of nuclear arthropod-specific large double-stranded DNA  
817 viruses (NALDVs). Relationships were derived using a maximum likelihood analysis with  
818 RAxML-NG, from 12 core NALDV genes, as defined by Burke et al., (2021), with a total of  
819 6818 characters from concatenated amino acid sequences. Bootstrap branch support values  
820 over 50% are indicated on relevant branches. Species names are abbreviated as follows; *Apis*  
821 *mellifera* filamentous virus (*AmFV*), White spot syndrome virus (*WSSV*), *Chionoecetes opilio*  
822 *bacilliform* virus (*CoBV*), *Culex nigripalpus* nucleopolyhedrovirus (*CnNPV*), *Neodiprion sertifer*  
823 nucleopolyhedrovirus (*NsNPV*), *Cydia pomonella* granulovirus (*CpGV*), *Autographa*  
824 *californica* multiple nucleopolyhedrovirus (*AcMNPV*), *Gryllus bimaculatus* nudivirus (*GbNV*),  
825 *Oryctes rhinoceros* nudivirus (*OrNV*), *Drosophila innubila* nudivirus (*DiNV*), *Tipula oleracea*  
826 nudivirus (*ToNV*), *Helicoverpa zea* nudivirus 2 (*HzNV-2*), *Penaeus monodon* nudivirus  
827 (*PmNV*), *Musca domestica* salivary gland hypertrophy virus (*MdSGHV*), *Glossina pallidipes*  
828 salivary gland hypertrophy virus (*GpSGHV*), *Leptopilina bouvardi* filamentous virus (*LbFV*),  
829 *Drosophila-associated* filamentous virus (*DaFV*), and *Microctonus hyperodae* filamentous  
830 virus (*MhFV*).

831

832 **Supplementary Table 1** Accessions for virus genes used to construct nuclear arthropod-  
833 specific large double-stranded DNA virus phylogeny.

834

835 **Supplementary Table 2** Viral hits in *Microctonus* genomes from the reciprocal BlastP  
836 analysis.

837

838 **Supplementary Table 3** A comparison of MhFV virus genome characteristics to other nuclear  
839 arthropod-specific large double-stranded DNA viruses.

840

841 **Supplementary Table 4** BlastP and HMMscan annotations for MhFV ORFs.

842

843 **Supplementary Table 5** Significant differentially expressed genes (DEGs) from DESeq2 MhFV  
844 tissue LRT analysis.

845

846 **Supplementary Figure 1** Rudimentary estimation of *Microctonus* evolutionary origin based  
847 on an ultrametric Orthofinder species tree, using a branch length scaling factor of 563.12.  
848 The *Microctonus* clade is highlighted in the blue dashed box. The “Irish”, “French” and  
849 “Moroccan” strains of *Microctonus aethiopoidea* are Maeth IR, Maeth FR and Maeth MO  
850 respectively. *Drosophila melanogaster* is the outgroup. The divergence of *Acromyrmex*  
851 *echinator* (\*) and *Camponotus floridanus* (\*) from Peters et al. (2017) was used to calibrate  
852 the molecular clock and is indicated by an arrow. The Hymenoptera abbreviations are as

853 follows: Nvit (*Nasonia vitripennis*), Tpre (*Trichogramma pretiosum*), Vvul (*Vespula vulgaris*),  
854 Vpen (*Vespula pensylvanica*), Vger (*Vespula germanica*), Dnov (*Dufourea novaeangliae*),  
855 Mrot (*Megachile rotundata*), Ccal (*Ceratina calcarata*), Amel (*Apis mellifera*), Acer (*Apis*  
856 *cerana*), Bter (*Bombus terrestris*), Bimp (*Bombus impatiens*), Hsal (*Harpegnathos saltator*),  
857 Cbir (*Cerapachys biroi*), Lhum (*Linepithema humile*), Fexs (*Formica exsecta*), Cflo  
858 (*Camponotus floridanus*), Pbar (*Pogonomyrmex barbatus*), Cobs (*Cardiocondyla obscurior*),  
859 Veme (*Vollenhovia emeryi*), Mpha (*Monomorium pharaonic*), Sinv (*Solenopsis invicta*), Waur  
860 (*Wasmannia auropunctata*), Aech (*Acromyrmex echinator*) and Acep (*Atta cephalotes*).

861

862 **Supplementary Figure 2** HCR in situ hybridisation of MND1 (red) and DAPI staining (cyan) in  
863 the ovaries of asexual “Irish” *M. aethiopoides*, with MND1 expression highlighted by the  
864 dashed red box.

865

866 **Supplementary Figure 3** Stacked bar graphs showing the number of significant BlastP hits to  
867 viral families for predicted proteins from *Microctonus* genome assemblies. Significant BlastP  
868 hits were those with E-values below the E-value threshold of 1E-05. Viral hits are divided  
869 into two panels, the upper containing hits to DNA viruses, and the lower to RNA viruses. *M.*  
870 *aethiopoides* Irish is not shown in the upper panel due to having no DNA virus hits.

871

872 **Supplementary Figure 4** Scatterplots and boxplots of mean sequencing depth and GC  
873 content of contigs in *Microctonus* genomes. Contigs with viral genes are in purple, and  
874 contigs with BUSCO orthologs (for *M. aethiopoides* strains) or Hi-C scaffolds (for *M.*  
875 *hyperodae*), in yellow. Reported P-values were determined using a Kruskal-Wallis test,  
876 followed by a pairwise Wilcoxon test. The number of contigs in each group is reported in the  
877 GC content boxplot.

878

879 **Supplementary Figure 5** A clustered heatmap showing expression for all MhFV genes, across  
880 the pupa, head, thorax, abdomen, ovaries and venom of *M. hyperodae*, normalized by VST.  
881 Genes detected as significantly differentially expressed in the tissue LRT analysis are  
882 indicated in bold.

883

884

## 885 References

886

- 887 Antipov, D., Rayko, M., Kolmogorov, M., & Pevzner, P. A. (2022). viralFlye: assembling viruses  
888 and identifying their hosts from long-read metagenomics data. *Genome Biol.*, 23(1), 1–  
889 21.
- 890 Arakaki, N., Noda, H., & Yamagishi, K. (2000). Wolbachia-induced parthenogenesis in the egg  
891 parasitoid *Telenomus nawai*. *Entomol. Exp. Appl.*, 96(2), 177–184.

- 892 <https://doi.org/10.1046/j.1570-7458.2000.00693.x>
- 893 Barker, G. M. (2013). Biology of the introduced biocontrol agent *Microctonus hyperodae*  
894 (Hymenoptera: Braconidae) and its host *Listronotus bonariensis* (Coleoptera:  
895 Curculionidae) in Northern New Zealand. *Environ. Entomol.*, *42*(5), 902–914.  
896 <https://doi.org/10.1603/EN11248>
- 897 Barker, G. M., & Addison, P. J. (2006). Early impact of endoparasitoid *Microctonus*  
898 *hyperodae* (hymenoptera: braconidae) after its establishment in *Listronotus*  
899 *bonariensis* (coleoptera: curculionidae) populations of northern New Zealand pastures.  
900 *J. Econ. Entomol.*, *99*(2), 273–287. <https://doi.org/10.1093/jee/99.2.273>
- 901 Barratt, B. I. P., Evans, A. A., Ferguson, C. M., Barker, G. M., McNeill, M. R., & Phillips, C. B.  
902 (1997). Laboratory Nontarget Host Range of the Introduced Parasitoids *Microctonus*  
903 *aethiopoides* and *M. hyperodae* (Hymenoptera: Braconidae) Compared with Field  
904 Parasitism in New Zealand. *Environ. Entomol.*, *26*(3), 694–702.  
905 <https://doi.org/10.1093/ee/26.3.694>
- 906 Barratt, B. I. P., Evans, A. A., Stoltz, D. B., Vinson, S. B., & Easingwood, R. (1999). Virus-like  
907 Particles in the Ovaries of *Microctonus aethiopoides* Loan (Hymenoptera: Braconidae),  
908 a Parasitoid of Adult Weevils (Coleoptera: Curculionidae). In *Journal of Invertebrate*  
909 *Pathology* (Vol. 73, Issue 2). <https://doi.org/10.1006/jipa.1998.4826>
- 910 Barratt, B. I. P., Murney, R., Easingwood, R., & Ward, V. K. (2006). Virus-like particles in the  
911 ovaries of *Microctonus aethiopoides* Loan (Hymenoptera: Braconidae): Comparison of  
912 biotypes from Morocco and Europe. *J. Invertebr. Pathol.*, *91*(1), 13–18.  
913 <https://doi.org/10.1016/j.jip.2005.10.008>
- 914 Bickhart, D. M., Rosen, B. D., Koren, S., Sayre, B. L., Hastie, A. R., Chan, S., Lee, J., Lam, E. T.,  
915 Liachko, I., & Sullivan, S. T. (2017). Single-molecule sequencing and chromatin  
916 conformation capture enable de novo reference assembly of the domestic goat  
917 genome. *Nat. Genet.*, *49*(4), 643–650.
- 918 Burke, G. R., Hines, H. M., & Sharanowski, B. J. (2021). The presence of ancient core genes  
919 reveals endogenization from diverse viral ancestors in parasitoid wasps. *Genome Biol.*  
920 *Evol.* <https://doi.org/10.1093/gbe/evab105>
- 921 Casanovas, P., Goldson, S. L., & Tylianakis, J. M. (2018). Asymmetry in reproduction  
922 strategies drives evolution of resistance in biological control systems. *PLoS One*, *13*(12),  
923 e0207610. <https://doi.org/10.1371/journal.pone.0207610>
- 924 Chapman, J. A., Ho, I., Sunkara, S., Luo, S., Schroth, G. P., & Rokhsar, D. S. (2011).  
925 Meraculous: de novo genome assembly with short paired-end reads. *PLoS One*, *6*(8),  
926 e23501.
- 927 Chiu, E., Hijnen, M., Bunker, R. D., Boudes, M., Rajendran, C., Aizel, K., Oliéric, V., Schulze-  
928 Briese, C., Mitsuhashi, W., Young, V., Ward, V. K., Bergoin, M., Metcal, P., & Coulibaly, F.  
929 (2015). Structural basis for the enhancement of virulence by viral spindles and their in  
930 vivo crystallization. *Proc. Natl. Acad. Sci. U. S. A.*, *112*(13), 3973–3978.  
931 <https://doi.org/10.1073/pnas.1418798112>
- 932 Coffman, K. A., Hankinson, Q. M., & Burke, G. R. (2022). A viral mutualist employs posthatch  
933 transmission for vertical and horizontal spread among parasitoid wasps. *Proc. Natl.*  
934 *Acad. Sci.*, *119*(16), e2120048119.
- 935 Crook, N. E., Clem, R. J., & Miller, L. K. (1993). An apoptosis-inhibiting baculovirus gene with  
936 a zinc finger-like motif. *J. Virol.*, *67*(4), 2168–2174.

- 937 <https://doi.org/10.1128/jvi.67.4.2168-2174.1993>
- 938 Dalla Benetta, E., Antoshechkin, I., Yang, T., Nguyen, H. Q. M., Ferree, P. M., & Akbari, O. S.  
939 (2020). Genome elimination mediated by gene expression from a selfish chromosome.  
940 *Sci. Adv.*, *6*(14), eaaz9808.
- 941 Di Giovanni, D., Lepetit, D., Guinet, B., Bennetot, B., Boulesteix, M., Couté, Y., Bouchez, O.,  
942 Ravallec, M., & Varaldi, J. (2020). A behavior-manipulating virus relative as a source of  
943 adaptive genes for drosophila parasitoids. *Mol. Biol. Evol.*, *37*(10), 2791–2807.  
944 <https://doi.org/10.1093/molbev/msaa030>
- 945 Doherty, K. M., Sharma, S., Uzdilla, L. A., Wilson, T. M., Cui, S., Vindigni, A., & Brosh, R. M.  
946 (2005). RECQ1 Helicase Interacts with Human Mismatch Repair Factors That Regulate  
947 Genetic Recombination\*[boxes]. *J. Biol. Chem.*, *280*(30), 28085–28094.
- 948 Drezen, J. M., Leobold, M., Bézier, A., Huguet, E., Volkoff, A. N., & Herniou, E. A. (2017).  
949 Endogenous viruses of parasitic wasps: variations on a common theme. *Curr. Opin.*  
950 *Virol.*, *25*, 41–48. <https://doi.org/10.1016/j.coviro.2017.07.002>
- 951 Eddy, S. R. (2011). Accelerated profile HMM searches. *PLoS Comput. Biol.*, *7*(10), e1002195.
- 952 Emms, D. M., & Kelly, S. (2015). OrthoFinder: solving fundamental biases in whole genome  
953 comparisons dramatically improves orthogroup inference accuracy. *Genome Biol.*,  
954 *16*(1), 1–14.
- 955 Emms, D. M., & Kelly, S. (2019). OrthoFinder: phylogenetic orthology inference for  
956 comparative genomics. *Genome Biol.*, *20*, 1–14.
- 957 Ferguson, C. M., Barratt, B. I. P. B. I. P., Bell, N., Goldson, S. L. L., Hardwick, S., Jackson, M.,  
958 Jackson, T. A. A., Phillips, C. B. C. B., Popay, A. J. J., Rennie, G., Sinclair, S., Townsend, R.,  
959 & Wilson, M. (2019). Quantifying the economic cost of invertebrate pests to New  
960 Zealand’s pastoral industry. *New Zeal. J. Agric. Res.*, *62*(3), 255–315.  
961 <https://doi.org/10.1080/00288233.2018.1478860>
- 962 Finn, R. D., Bateman, A., Clements, J., Coggill, P., Eberhardt, R. Y., Eddy, S. R., Heger, A.,  
963 Hetherington, K., Holm, L., Mistry, J., Sonnhammer, E. L. L., Tate, J., & Punta, M. (2014).  
964 Pfam: The protein families database. In *Nucleic Acids Research*.  
965 <https://doi.org/10.1109/TCSVT.2017.2671899>
- 966 Furihata, S. X., & Kimura, M. T. (2009). Effects of *Asobara japonica* venom on larval survival  
967 of host and nonhost *Drosophila* species. *Physiol. Entomol.*, *34*(3), 292–295.  
968 <https://doi.org/10.1111/j.1365-3032.2009.00676.x>
- 969 Furihata, S. X., Matsumura, T., Hirata, M., Mizutani, T., Nagata, N., Kataoka, M., Katayama,  
970 Y., Omatsu, T., Matsumoto, H., & Hayakawa, Y. (2016). Characterization of venom and  
971 oviduct components of parasitoid wasp *asobara japonica*. *PLoS One*, *11*(7).  
972 <https://doi.org/10.1371/journal.pone.0160210>
- 973 Gauthier, J., Boulain, H., van Vugt, J. J. F. A., Baudry, L., Persyn, E., Aury, J. M., Noel, B.,  
974 Bretaudeau, A., Legeai, F., Warris, S., Chebbi, M. A., Dubreuil, G., Duvic, B., Kremer, N.,  
975 Gayral, P., Musset, K., Josse, T., Bigot, D., Bressac, C., ... Drezen, J. M. (2021).  
976 Chromosomal scale assembly of parasitic wasp genome reveals symbiotic virus  
977 colonization. *Commun. Biol.*, *4*(1), 1–15. <https://doi.org/10.1038/s42003-020-01623-8>
- 978 Gerard, P. J., McNeill, M. R., Barratt, B. I. P., & Whiteman, S. A. (2006). Rationale for release  
979 of the Irish strain of *Microctonus aethiopoidea* for biocontrol of clover root weevil. *New*  
980 *Zeal. Plant Prot.*, *59*, 285–289. <https://doi.org/10.30843/nzpp.2006.59.4471>
- 981 Gerard, P. J., Wilson, D. J., & Eden, T. M. (2011). Field release, establishment and initial

- 982 dispersal of Irish *Microctonus aethiopoidea* in *Sitona lepidus* populations in northern  
983 New Zealand pastures. *BioControl*, 56(6), 861–870. [https://doi.org/10.1007/s10526-](https://doi.org/10.1007/s10526-011-9367-5)  
984 011-9367-5
- 985 Goldson, S. L., McNeill, M. R., & Proffitt, J. R. (2003). Negative effects of strain hybridisation  
986 on the biocontrol agent *Microctonus aethiopoidea*. *New Zeal. Plant Prot.*,  
987 56(November), 138–142.
- 988 Goldson, S. L., McNeill, M. R., & Proffitt, J. R. (1993). Unexplained mortality amongst  
989 parasitized *Listronotus bonariensis* in the presence of the parasitoid *Microctonus*  
990 *hyperodae* under caging conditions. *Proc. 6th Australas. Conf. Grassl. Invertebr. Ecol.*,  
991 355–362.
- 992 Goldson, S. L., McNeill, M. R., Proffitt, J. R., Barker, G. M., Addison, P. J., Barratt, B. I. P., &  
993 Ferguson, C. M. (1993). Systematic mass rearing and release of *Microctonus hyperodae*  
994 (Hym.: Braconidae, Euphorinae), a parasitoid of the argentine stem weevil *Listronotus*  
995 *bonariensis* (Col.: Curculionidae) and records of its establishment in New Zealand.  
996 *Entomophaga*, 38(4), 527–536. <https://doi.org/10.1007/BF02373087>
- 997 Goldson, S. L., McNeill, M. R., Proffitt, J. R., Phillips, C. B., Gerard, P. J., Murray, P. J., Cane, R.  
998 P., Proffitt, J. R., Phillips, C. B., Cane, R. P., & Murray, P. J. (2004). British-based search  
999 for natural enemies of the clover root weevil, *Sitona lepidus* in Europe. *New Zeal. J.*  
1000 *Zool.*, 31(3), 233–240. <https://doi.org/10.1080/03014223.2004.9518375>
- 1001 Goldson, S. L., McNeill, M. R., Stufkens, M. W., Proffitt, J. R., Pottinger, R. P., & Farrell, J. A.  
1002 (1990). Importation and quarantine of *Microctonus hyperodae*, a South American  
1003 parasitoid of Argentine stem weevil. In *Proceedings of the Forty Third New Zealand*  
1004 *Weed and Pest Control Conference* (pp. 334–338). New Zealand Weed and Pest Control  
1005 Society Inc.
- 1006 Goldson, S. L., Proffitt, J. R., & Baird, D. B. (1998). Establishment and Phenology of the  
1007 Parasitoid *Microctonus hyperodae* (Hymenoptera: Braconidae) in New Zealand.  
1008 *Environ. Entomol.*, 27(6), 1386–1392. <https://doi.org/10.1093/ee/27.6.1386>
- 1009 Goldson, S. L., Proffitt, J. R., McNeill, M. R., Phillips, C. B., Barlow, N. D., & Baird, D. B. (2004).  
1010 Unexpected *Listronotus bonariensis* (Coleoptera: Curculionidae) mortality in the  
1011 presence of parasitoids. *Bull. Entomol. Res.*, 94(5), 411–417.  
1012 <https://doi.org/10.1079/ber2004314>
- 1013 Goldson, S. L., Wratten, S. D., Ferguson, C. M., Gerard, P. J., Barratt, B. I. P., Hardwick, S.,  
1014 McNeill, M. R., Phillips, C. B., Popay, A. J., Tylianakis, J. M., & Tomasetto, F. (2014). If  
1015 and when successful classical biological control fails. *Biol. Control*, 72, 76–79.  
1016 <https://doi.org/10.1016/j.biocontrol.2014.02.012>
- 1017 Harrop, T. W. R., Le Lec, M. F., Jauregui, R., Taylor, S. E., Inwood, S. N., van Stijn, T., Henry,  
1018 H., Skelly, J. G., Ganesh, S., Ashby, R. L., Jacobs, J. M. E., Goldson, S. L., & Dearden, P. K.  
1019 (2020). Genetic diversity in invasive populations of argentine stem weevil associated  
1020 with adaptation to biocontrol. *Insects*, 11(7), 1–14.  
1021 <https://doi.org/10.3390/insects11070441>
- 1022 Hu, J., Fan, J., Sun, Z., & Liu, S. (2020). NextPolish: a fast and efficient genome polishing tool  
1023 for long-read assembly. *Bioinformatics*.
- 1024 Hyatt, D., Chen, G. L., LoCascio, P. F., Land, M. L., Larimer, F. W., & Hauser, L. J. (2010).  
1025 Prodigal: Prokaryotic gene recognition and translation initiation site identification. *BMC*

- 1026 *Bioinformatics*, 11(1), 119. <https://doi.org/10.1186/1471-2105-11-119>
- 1027 Iline, I. I., & Phillips, C. B. (2004). Allozyme markers to help define the South American origins  
1028 of *Microctonus hyperodae* (Hymenoptera: Braconidae) established in New Zealand for  
1029 biological control of Argentine stem weevil. *Bull. Entomol. Res.*, 94(3), 229–234.  
1030 <https://doi.org/10.1079/ber2004303>
- 1031 Inwood, S. N., Harrop, T. W. R. R., & Dearden, P. K. (2023). The venom composition and  
1032 parthenogenesis mechanism of the parasitoid wasp *Microctonus hyperodae*, a declining  
1033 biocontrol agent. *Insect Biochem. Mol. Biol.*, 153, 103897.  
1034 <https://doi.org/10.1016/j.ibmb.2022.103897>
- 1035 Kawato, S., Shitara, A., Wang, Y., Nozaki, R., Kondo, H., & Hirono, I. (2019). Crustacean  
1036 Genome Exploration Reveals the Evolutionary Origin of White Spot Syndrome Virus. *J.*  
1037 *Virology*, 93(3), e01144-18. <https://doi.org/10.1128/jvi.01144-18>
- 1038 Klose, R. J., Kallin, E. M., & Zhang, Y. (2006). JmjC-domain-containing proteins and histone  
1039 demethylation. *Nat. Rev. Genet.*, 7(9), 715–727. <https://doi.org/10.1038/nrg1945>
- 1040 Kolde, R. (2019). *Pretty Heatmaps* (R package version 1.0.12; pp. 1–8). [https://cran.r-](https://cran.r-project.org/package=pheatmap)  
1041 [project.org/package=pheatmap](https://cran.r-project.org/package=pheatmap)
- 1042 Kolmogorov, M., Bickhart, D. M., Behsaz, B., Gurevich, A., Rayko, M., Shin, S. B., Kuhn, K.,  
1043 Yuan, J., Polevikov, E., & Smith, T. P. L. (2020). metaFlye: scalable long-read  
1044 metagenome assembly using repeat graphs. *Nat. Methods*, 17(11), 1103–1110.
- 1045 Kolmogorov, M., Yuan, J., Lin, Y., & Pevzner, P. A. (2019). Assembly of long, error-prone  
1046 reads using repeat graphs. *Nat. Biotechnol.*, 37(5), 540–546.
- 1047 Köster, J., & Rahmann, S. (2012). Snakemake—a scalable bioinformatics workflow engine.  
1048 *Bioinformatics*, 28(19), 2520–2522. <https://doi.org/10.1093/bioinformatics/bts480>
- 1049 Krzywinski, M., Schein, J., Birol, I., Connors, J., Gascoyne, R., Horsman, D., Jones, S. J., &  
1050 Marra, M. A. (2009). Circos: an information aesthetic for comparative genomics.  
1051 *Genome Res.*, 19(9), 1639–1645.
- 1052 Kück, P., & Longo, G. C. (2014). FASconCAT-G: Extensive functions for multiple sequence  
1053 alignment preparations concerning phylogenetic studies. *Front. Zool.*, 11(1), 1–8.  
1054 <https://doi.org/10.1186/s12983-014-0081-x>
- 1055 Lepetit, D., Gillet, B., Hughes, S., Kraaijeveld, K., & Varaldi, J. (2016). Genome sequencing of  
1056 the behavior manipulating virus lbfv reveals a possible new virus family. *Genome Biol.*  
1057 *Evol.*, 8(12), 3718–3739. <https://doi.org/10.1093/gbe/evw277>
- 1058 Letunic, I., & Bork, P. (2021). Interactive tree of life (iTOL) v5: An online tool for phylogenetic  
1059 tree display and annotation. *Nucleic Acids Res.*, 49(W1), W293–W296.  
1060 <https://doi.org/10.1093/nar/gkab301>
- 1061 Levasseur, A., Drula, E., Lombard, V., Coutinho, P. M., & Henrissat, B. (2013). Expansion of  
1062 the enzymatic repertoire of the CAZy database to integrate auxiliary redox enzymes.  
1063 *Biotechnol. Biofuels*, 6(1), 1–14. <https://doi.org/10.1186/1754-6834-6-41>
- 1064 Li, H. (2018). Minimap2: Pairwise alignment for nucleotide sequences. *Bioinformatics*,  
1065 34(18), 3094–3100. <https://doi.org/10.1093/bioinformatics/bty191>
- 1066 Li, H., & Durbin, R. (2009). Fast and accurate short read alignment with Burrows-Wheeler  
1067 transform. *Bioinformatics*, 25(14), 1754–1760.  
1068 <https://doi.org/10.1093/bioinformatics/btp324>
- 1069 Li, H., Handsaker, B., Wysoker, A., Fennell, T., Ruan, J., Homer, N., Marth, G., Abecasis, G., &  
1070 Durbin, R. (2009). The Sequence Alignment/Map format and SAMtools. *Bioinformatics*,

- 1071 25(16), 2078–2079. <https://doi.org/10.1093/bioinformatics/btp352>
- 1072 Lieberman-Aiden, E., Van Berkum, N. L., Williams, L., Imakaev, M., Ragozy, T., Telling, A.,  
1073 Amit, I., Lajoie, B. R., Sabo, P. J., & Dorschner, M. O. (2009). Comprehensive mapping of  
1074 long-range interactions reveals folding principles of the human genome. *Science (80-. )*,  
1075 326(5950), 289–293.
- 1076 Love, M. I., Huber, W., & Anders, S. (2014). Moderated estimation of fold change and  
1077 dispersion for RNA-seq data with DESeq2. *Genome Biol.*, 15(12), 550.  
1078 <https://doi.org/10.1186/s13059-014-0550-8>
- 1079 Lu, A., & Miller, L. K. (1995). The roles of eighteen baculovirus late expression factor genes in  
1080 transcription and DNA replication. *J. Virol.*, 69(2), 975–982.  
1081 <https://doi.org/10.1128/jvi.69.2.975-982.1995>
- 1082 Ma, W. J., & Schwander, T. (2017). Patterns and mechanisms in instances of endosymbiont-  
1083 induced parthenogenesis. *J. Evol. Biol.*, 30(5), 868–888.  
1084 <https://doi.org/10.1111/jeb.13069>
- 1085 Martinez, J., Fleury, F., & Varaldi, J. (2012). Heritable variation in an extended phenotype:  
1086 The case of a parasitoid manipulated by a virus. *J. Evol. Biol.*, 25(1), 54–65.  
1087 <https://doi.org/10.1111/j.1420-9101.2011.02405.x>
- 1088 McKenna, A., Hanna, M., Banks, E., Sivachenko, A., Cibulskis, K., Kernytsky, A., Garimella, K.,  
1089 Altshuler, D., Gabriel, S., & Daly, M. (2010). The Genome Analysis Toolkit: a MapReduce  
1090 framework for analyzing next-generation DNA sequencing data. *Genome Res.*, 20(9),  
1091 1297–1303.
- 1092 McNeill, M. R., Goldson, S. L., Proffitt, J. R., Phillips, C. B., & Addison, P. J. (2002). A  
1093 description of the commercial rearing and distribution of *Microctonus hyperodae*  
1094 (Hymenoptera: Braconidae) for biological control of *Listronotus bonariensis* (Kuschel)  
1095 (Coleoptera: Curculionidae). *Biol. Control*, 24(2), 167–175.  
1096 [https://doi.org/10.1016/S1049-9644\(02\)00018-X](https://doi.org/10.1016/S1049-9644(02)00018-X)
- 1097 McNeill, M. R., Proffitt, J. R., Gerard, P. J., & Goldson, S. L. (2006). Collections of *Microctonus*  
1098 *aethiopoulos* Loan (Hymenoptera Braconidae) from Ireland. *New Zeal. Plant Prot.*, 59,  
1099 290–296.
- 1100 Mitchell, A. L., Attwood, T. K., Babbitt, P. C., Blum, M., Bork, P., Bridge, A., Brown, S. D.,  
1101 Chang, H.-Y., El-Gebali, S., & Fraser, M. I. (2019). InterPro in 2019: improving coverage,  
1102 classification and access to protein sequence annotations. *Nucleic Acids Res.*, 47(D1),  
1103 D351–D360.
- 1104 Oxley, P. R., Ji, L., Fetter-Pruneda, I., McKenzie, S. K., Li, C., Hu, H., Zhang, G., & Kronauer, D.  
1105 J. C. (2014). The genome of the clonal raider ant *Cerapachys biroi*. *Curr. Biol.*, 24(4),  
1106 451–458.
- 1107 Palmer, J., & Stajich, J. (2019). *nextgenusfs/funannotate: funannotate v1.6.0*. Zenodo.  
1108 <https://doi.org/https://doi.org/10.5281/zenodo.3354704>
- 1109 Patot, S., Allemand, R., Fleury, F., & Varaldi, J. (2012). An inherited virus influences the  
1110 coexistence of parasitoid species through behaviour manipulation. *Ecol. Lett.*, 15(6),  
1111 603–610. <https://doi.org/10.1111/j.1461-0248.2012.01774.x>
- 1112 Patot, S., Martinez, J., Allemand, R., Gandon, S., Varaldi, J., & Fleury, F. (2010). Prevalence of  
1113 a virus inducing behavioural manipulation near species range border. *Mol. Ecol.*, 19(14),  
1114 2995–3007. <https://doi.org/10.1111/j.1365-294X.2010.04686.x>
- 1115 Pearcy, M., Hardy, O., & Aron, S. (2006). Thelytokous parthenogenesis and its consequences



- 1116 on inbreeding in an ant. *Heredity (Edinb.)*, 96(5), 377–382.
- 1117 Peters, R. S., Krogmann, L., Mayer, C., Donath, A., Gunkel, S., Meusemann, K., Kozlov, A.,  
1118 Podsiadlowski, L., Petersen, M., & Lanfear, R. (2017). Evolutionary history of the  
1119 Hymenoptera. *Curr. Biol.*, 27(7), 1013–1018.
- 1120 Petkovic, M., Dietschy, T., Freire, R., Jiao, R., & Stagljar, I. (2005). The human Rothmund-  
1121 Thomson syndrome gene product, RECQL4, localizes to distinct nuclear foci that  
1122 coincide with proteins involved in the maintenance of genome stability. *J. Cell Sci.*,  
1123 118(18), 4261–4269.
- 1124 Phanis, C. G., Miller, D. P., Cassar, S. C., Tristem, M., Thiem, S. M., & O'Reilly, D. R. (1999).  
1125 Identification and expression of two baculovirus gp37 genes. *J. Gen. Virol.*, 80(7), 1823–  
1126 1831. <https://doi.org/10.1099/0022-1317-80-7-1823>
- 1127 Phillips, C. B. (1995). *Intraspecific variation in Microctonus hyperdoae and M. aethiopicus*  
1128 *(Hymenoptera: Braconidae); significance for their use of biological control agents*.  
1129 Lincoln University.
- 1130 Phillips, C. B., & Kean, J. M. (2017). Response of parasitoid egg load to host dynamics and  
1131 implications for egg load evolution. *J. Evol. Biol.*, 30(7), 1313–1324.  
1132 <https://doi.org/10.1111/jeb.13095>
- 1133 Popay, A. J., McNeill, M. R., Goldson, S. L., & Ferguson, C. M. (2011). The current status of  
1134 Argentine stem weevil (*Listronotus bonariensis*) as a pest in the North Island of New  
1135 Zealand. *New Zeal. Plant Prot.*, 64, 55–62. <https://doi.org/10.30843/nzpp.2011.64.5962>
- 1136 R Development Core Team. (2020). A Language and Environment for Statistical Computing. *R*  
1137 *Found. Stat. Comput.*, <https://www.R-project.org>. <http://www.r-project.org>
- 1138 Ranallo-Benavidez, T. R., Jaron, K. S., & Schatz, M. C. (2020). GenomeScope 2.0 and  
1139 Smudgeplot for reference-free profiling of polyploid genomes. *Nat. Commun.*, 11(1),  
1140 1432.
- 1141 Rezazadeh, S. (2012). RecQ helicases; at the crossroad of genome replication, repair, and  
1142 recombination. *Mol. Biol. Rep.*, 39(4), 4527–4543.
- 1143 Schurko, A. M., & Logsdon, J. M. (2008). Using a meiosis detection toolkit to investigate  
1144 ancient asexual “scandals” and the evolution of sex. *BioEssays*, 30(6), 579–589.  
1145 <https://doi.org/10.1002/bies.20764>
- 1146 Schurko, A. M., Mazur, D. J., & Logsdon Jr, J. M. (2010). Inventory and phylogenomic  
1147 distribution of meiotic genes in *Nasonia vitripennis* and among diverse arthropods.  
1148 *Insect Mol. Biol.*, 19, 165–180.
- 1149 Shen, W., & Ren, H. (2021). TaxonKit: A practical and efficient NCBI taxonomy toolkit. *J.*  
1150 *Genet. Genomics*. <https://doi.org/10.1016/j.jgg.2021.03.006>
- 1151 Shields, M. W., Wratten, S. D., Phillips, C. B., Van Koten, C., & Goldson, S. L. (2022). Plant-  
1152 Mediated Behavioural Avoidance of a Weevil Towards Its Biological Control Agent.  
1153 *Front. Plant Sci.*, 13. <https://doi.org/10.3389/fpls.2022.923237>
- 1154 Shields, M. W., Wratten, S. D., Van Koten, C., Phillips, C. B., Gerard, P. J., & Goldson, S. L.  
1155 (2022). Behaviour drives contemporary evolution in a failing insect-parasitoid  
1156 importation biological control programme. *Front. Ecol. Evol.*, 10.  
1157 <https://doi.org/10.3389/FEVO.2022.923248>
- 1158 Simão, F. A., Waterhouse, R. M., Ioannidis, P., Kriventseva, E. V., & Zdobnov, E. M. (2015).  
1159 BUSCO: Assessing genome assembly and annotation completeness with single-copy  
1160 orthologs. *Bioinformatics*, 31(19), 3210–3212.

- 1161 <https://doi.org/10.1093/bioinformatics/btv351>  
1162 Simonsen, M., Mailund, T., & Pedersen, C. N. S. (2008). Rapid neighbour-joining. *Algorithms*  
1163 *Bioinforma. 8th Int. Work. WABI 2008, Karlsruhe, Ger. Sept. 15-19, 2008. Proc. 8*, 113–  
1164 122.  
1165 Stanke, M., Diekhans, M., Baertsch, R., & Haussler, D. (2008). Using native and syntenically  
1166 mapped cDNA alignments to improve de novo gene finding. *Bioinformatics*, 24(5), 637–  
1167 644.  
1168 Stouthamer, R., Luck, R. F., & Hamilton, W. D. (1990). Antibiotics cause parthenogenetic  
1169 Trichogramma (hymenoptera/trichogrammatidae) to revert to sex. *Proc. Natl. Acad. Sci.*  
1170 *U. S. A.*, 87(7), 2424–2427. <https://doi.org/10.1073/pnas.87.7.2424>  
1171 Stufkens, M. W., Farrell, J. A., & Goldson, S. L. (1987). *Establishment of Microctonus*  
1172 *aethiopoides*, a parasitoid of the sitona weevil, in New Zealand (A. J. Popay (ed.)).  
1173 Proceedings of the Forty Third New Zealand Weed and Pest Control Conference; The  
1174 New Zealand Weed and Pest Control Society.  
1175 Tomasetto, F., Tyljanakis, J. M., Reale, M., Wratten, S. D., & Goldson, S. L. (2017). Intensified  
1176 agriculture favors evolved resistance to biological control. *Proc. Natl. Acad. Sci. U. S. A.*,  
1177 114(15), 3885–3890. <https://doi.org/10.1073/pnas.1618416114>  
1178 Tvedte, E. S., Forbes, A. A., Logsdon, J. M., & Reed, F. (2017). Retention of Core Meiotic  
1179 Genes Across Diverse Hymenoptera. *J. Hered.*, 108(7), 791–806.  
1180 <https://doi.org/10.1093/jhered/esx062>  
1181 Varaldi, J., Boulétreau, M., & Fleury, F. (2005). Cost induced by viral particles manipulating  
1182 superparasitism behaviour in the parasitoid *Leptopilina boulardi*. *Parasitology*, 131(2),  
1183 161–168. <https://doi.org/10.1017/S0031182005007602>  
1184 Varaldi, J., Petit, S., Boulétreau, M., & Fleury, F. (2006). The virus infecting the parasitoid  
1185 *Leptopilina boulardi* exerts a specific action on superparasitism behaviour. *Parasitology*,  
1186 132(6), 747–756. <https://doi.org/10.1017/S0031182006009930>  
1187 Vereijssen, J., Armstrong, K. F., Barratt, B. I. P., Crawford, A. M., McNeill, M. R., & Goldson, S.  
1188 L. (2011). Evidence for parasitoid-induced premature mortality in the Argentine stem  
1189 weevil. *Physiol. Entomol.*, 36(2), 194–199. [https://doi.org/10.1111/j.1365-](https://doi.org/10.1111/j.1365-3032.2010.00773.x)  
1190 [3032.2010.00773.x](https://doi.org/10.1111/j.1365-3032.2010.00773.x)  
1191 Vink, C. J., Phillips, C. B., Mitchell, A. D., Winder, L. M., & Cane, R. P. (2003). Genetic variation  
1192 in *Microctonus aethiopoides* (Hymenoptera: Braconidae). *Biol. Control*, 28(2), 251–264.  
1193 Wang, Y., Tang, H., Debarry, J. D., Tan, X., Li, J., Wang, X., Lee, T., Jin, H., Marler, B., & Guo, H.  
1194 (2012). MCScanX: a toolkit for detection and evolutionary analysis of gene synteny and  
1195 collinearity. *Nucleic Acids Res.*, 40(7), e49–e49.  
1196 Wood, D. E., Lu, J., & Langmead, B. (2019). Improved metagenomic analysis with Kraken 2.  
1197 *Genome Biol.*, 20(1), 1–13. <https://doi.org/10.1186/s13059-019-1891-0>  
1198 Ye, X. qian, Shi, M., Huang, J. hua, & Chen, X. xin. (2018). Parasitoid polydnviruses and  
1199 immune interaction with secondary hosts. *Dev. Comp. Immunol.*, 83, 124–129.  
1200 <https://doi.org/10.1016/j.dci.2018.01.007>  
1201
