# Supplementary material for: Scaffold-level genome assemblies of two parasitoid biocontrol wasps reveal the parthenogenesis mechanism and an associated novel virus
Source: bioRxiv or medRxiv preprint supplement (doi:10.1101/2023.05.25.542369), 2023-05-29

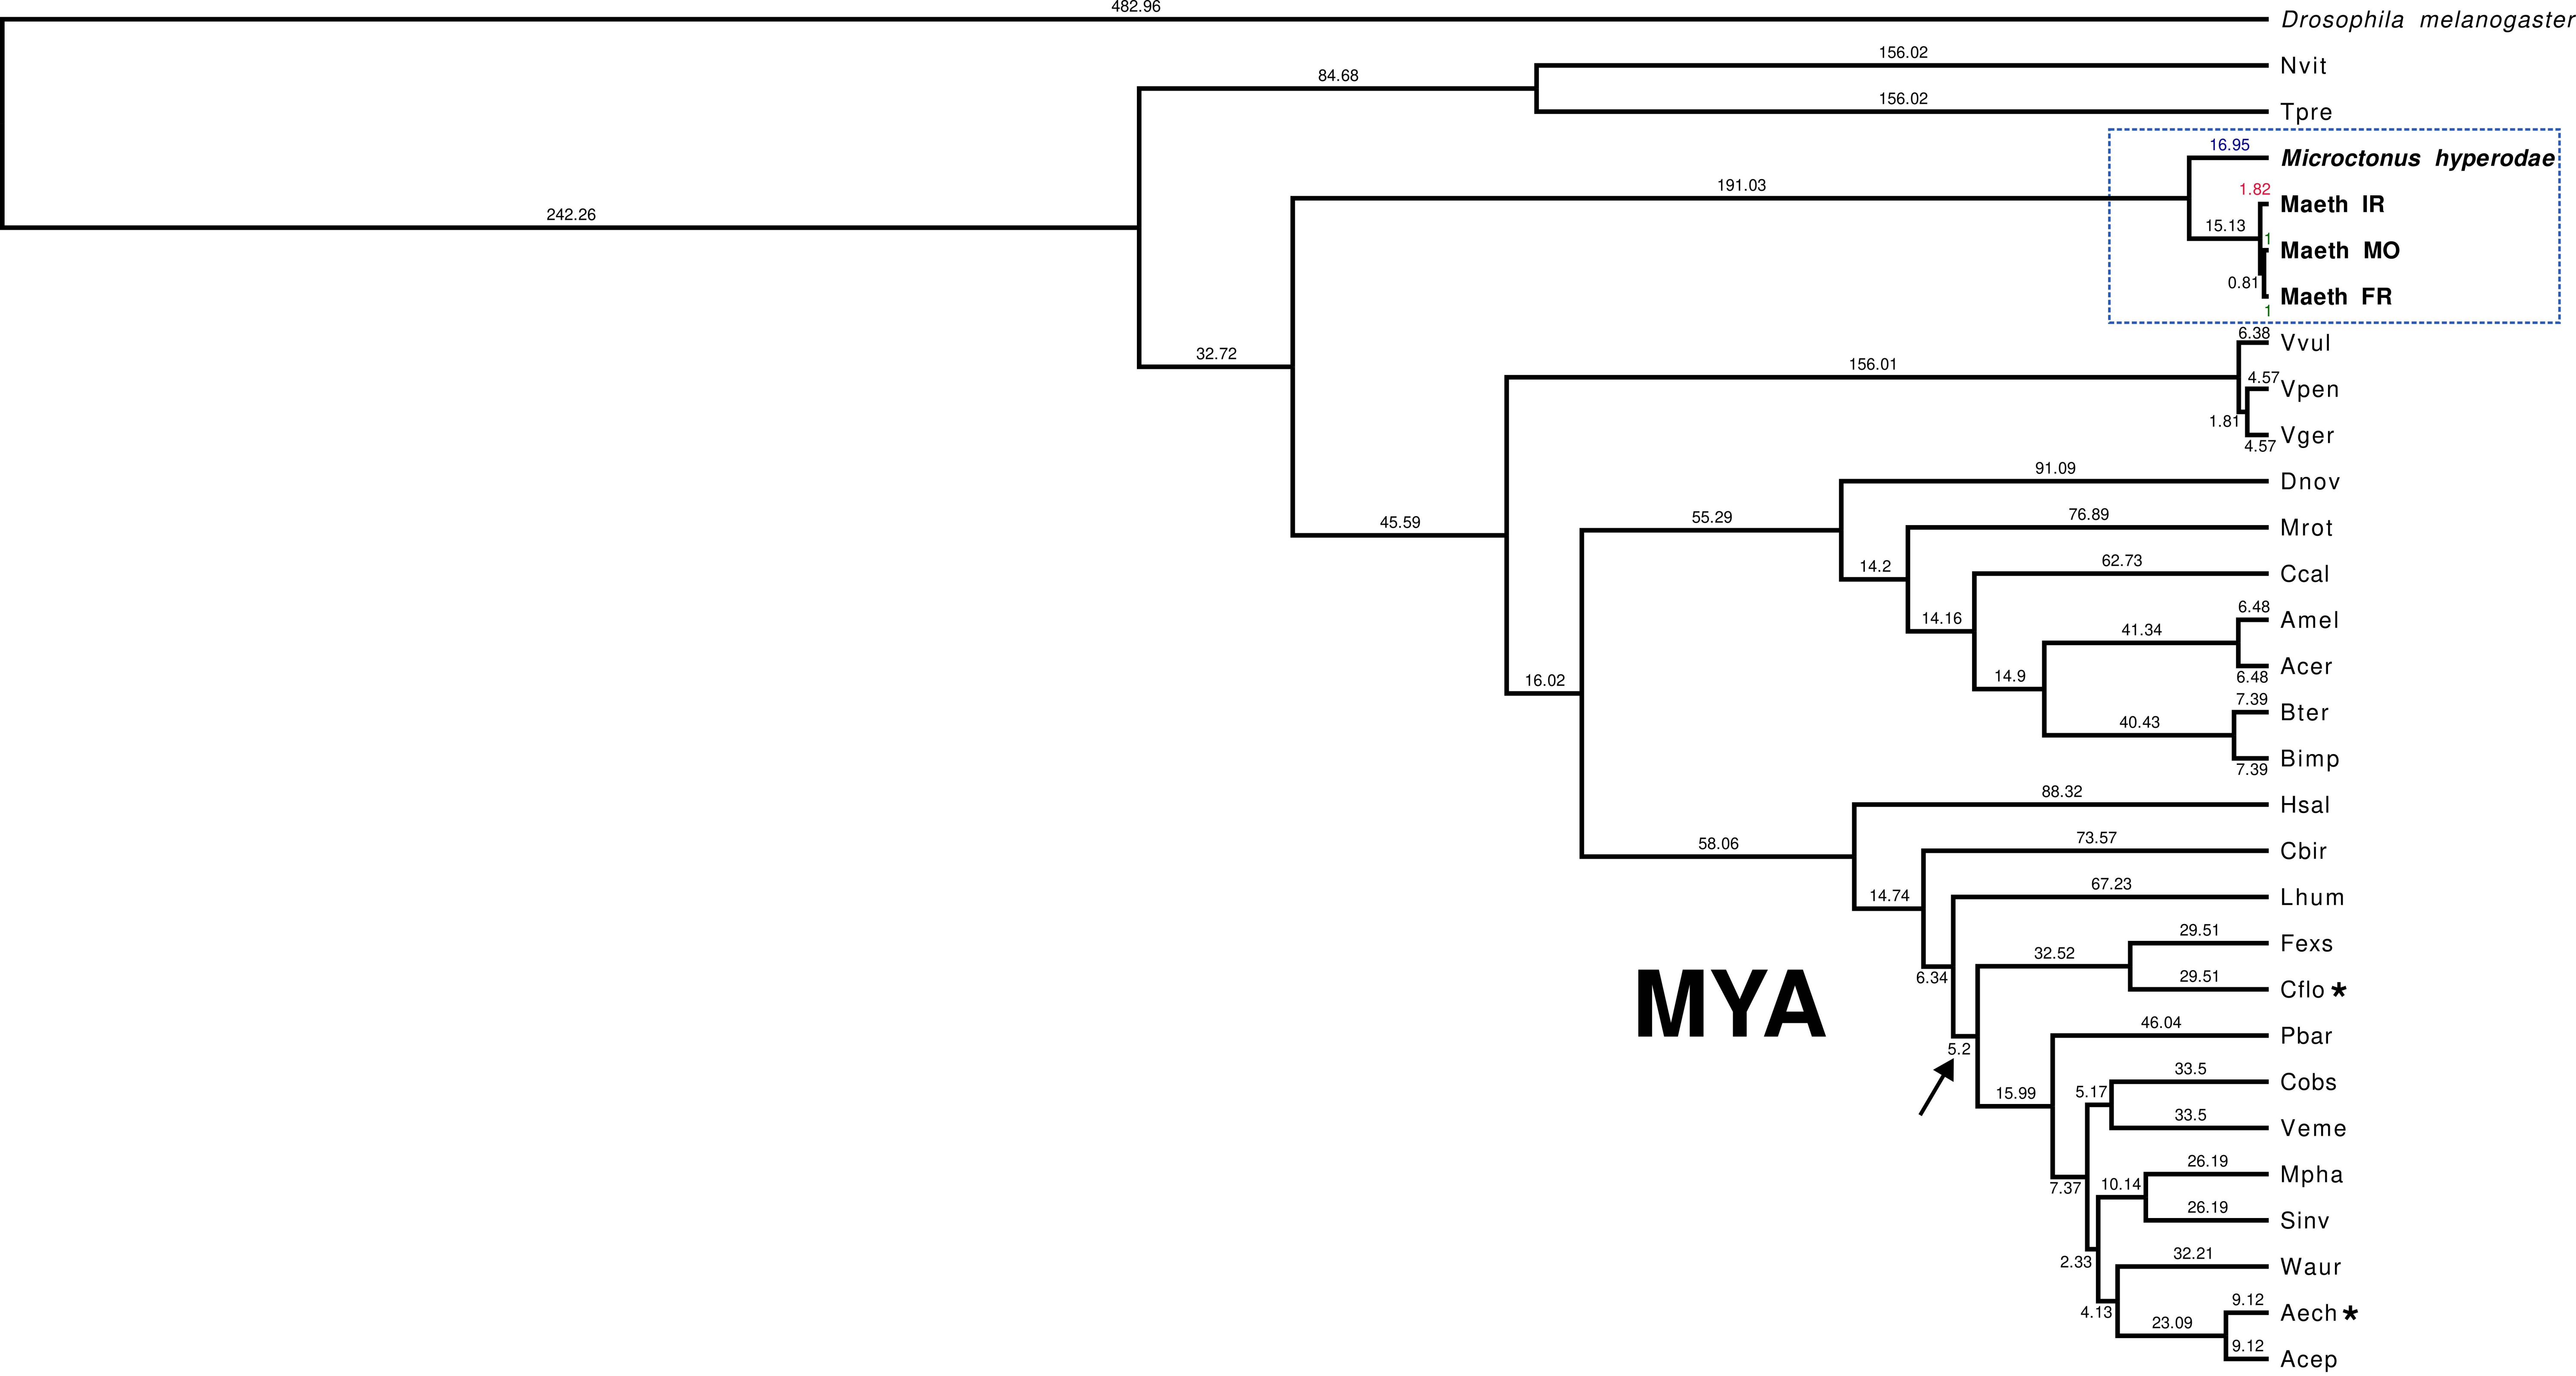

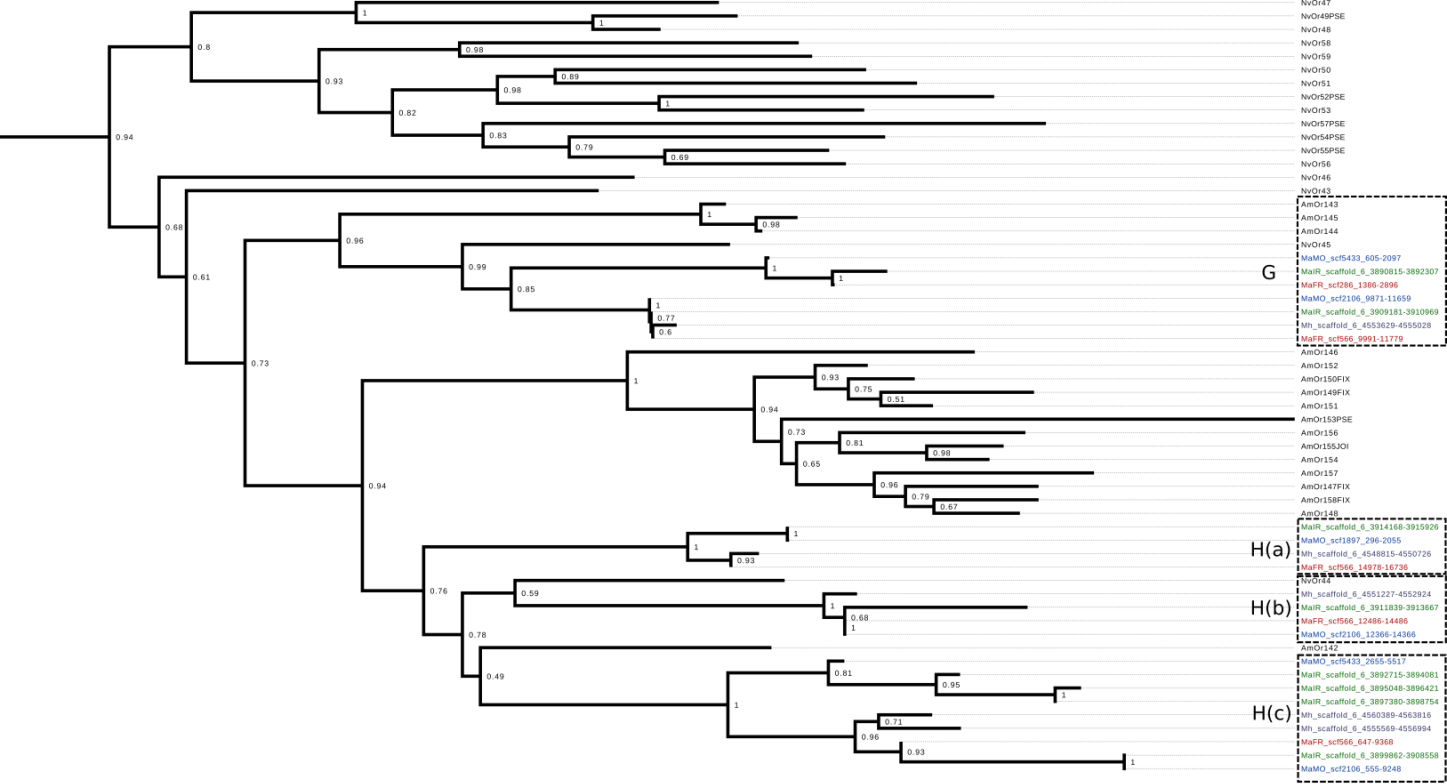

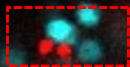

Species

*M. hyperodae*  
*M. aethioides*  
Moroccan  
*M. aethioides*  
French

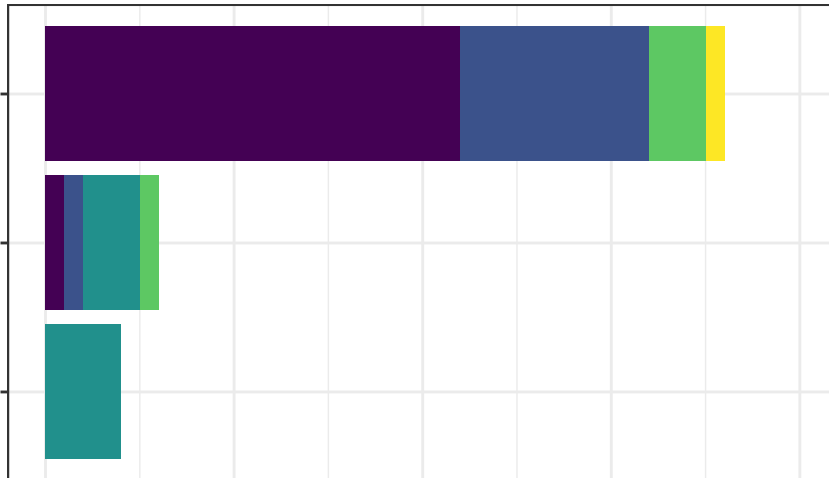

DNA virus family

- unclassified DNA virus
- Baculoviridae*
- Polydnaviridae*
- Nudiviridae*
- Ascoviridae*

Species

*M. hyperodae*  
*M. aethioides*  
Moroccan  
*M. aethioides*  
French  
*M. aethioides*  
Irish

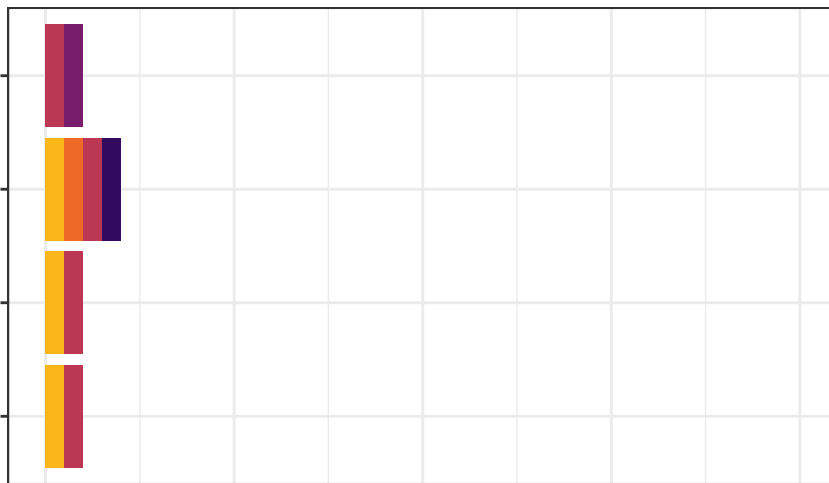

RNA virus family

- unclassified RNA virus
- Totiviridae*
- Rhabdoviridae*
- Phenuiviridae*
- Chuviridae*

0 10 20 30 40

Number of peptides with viral hits

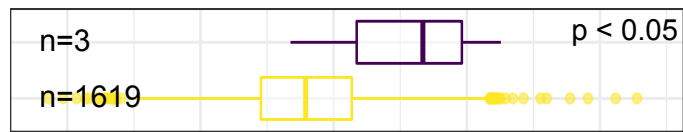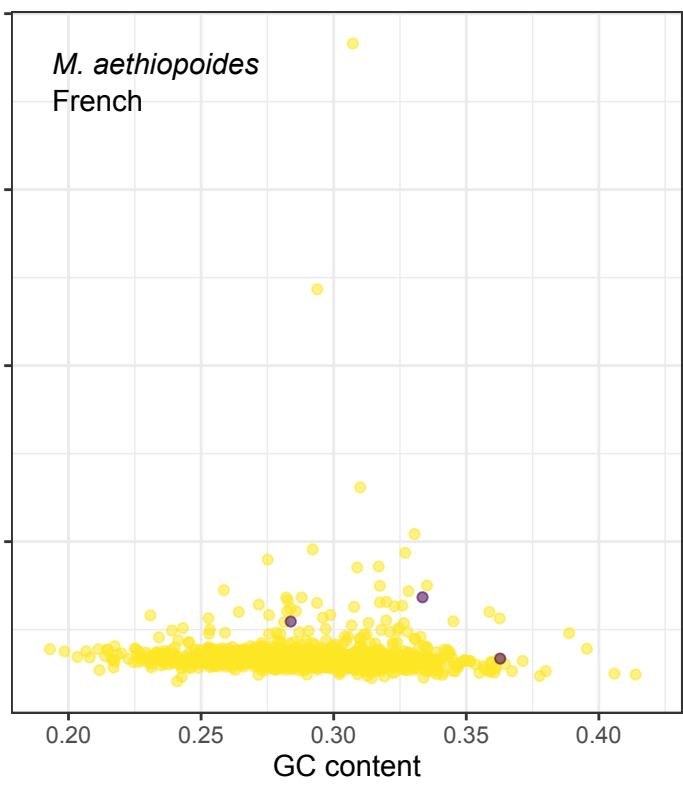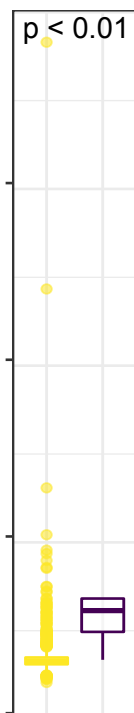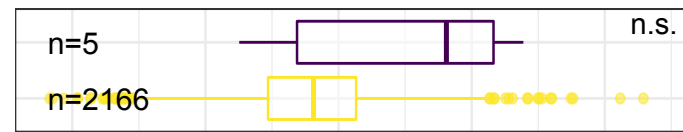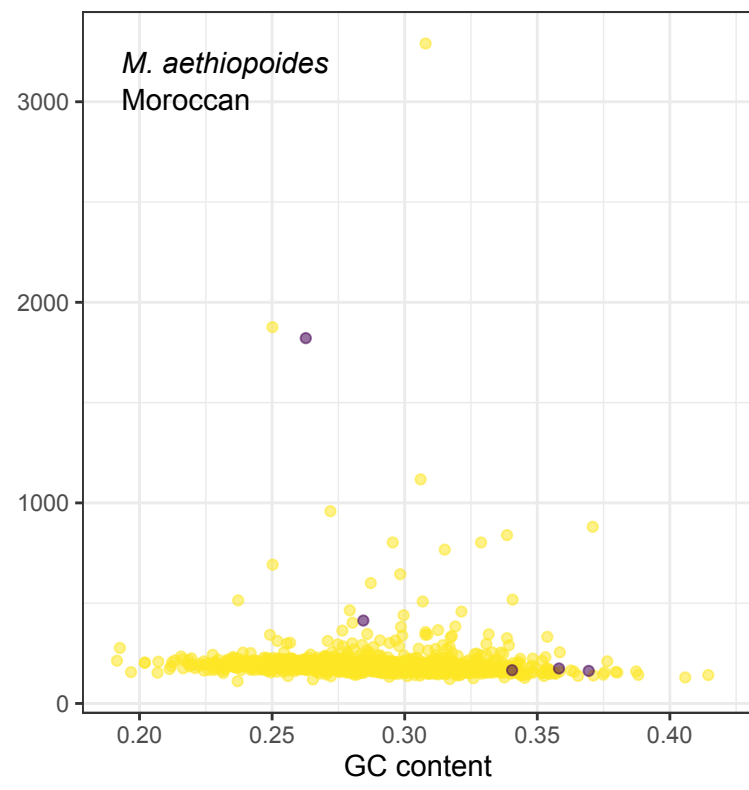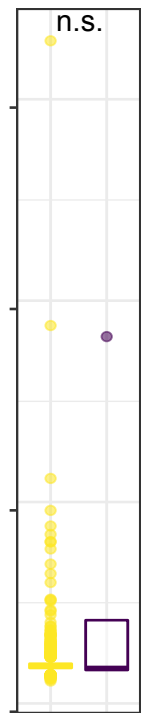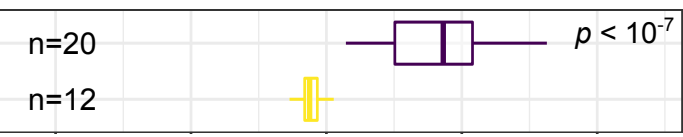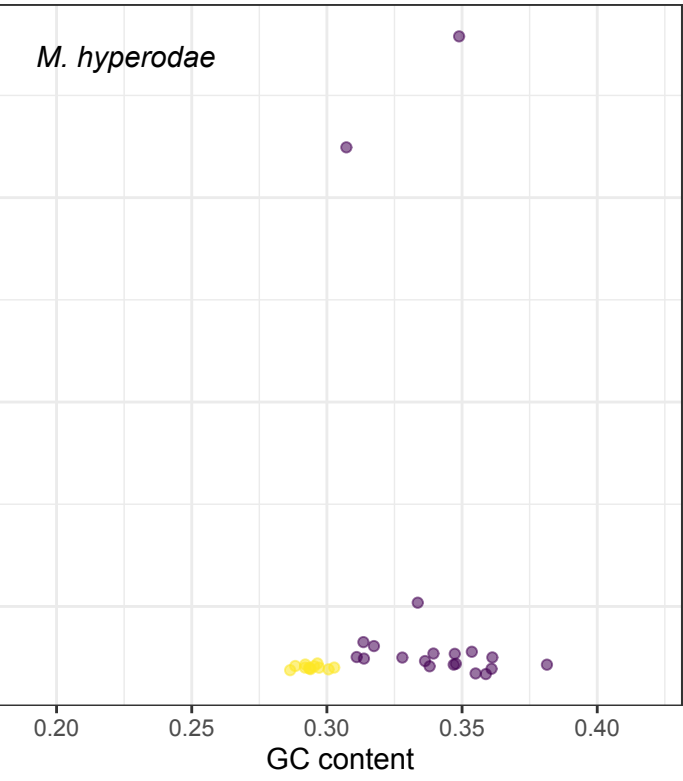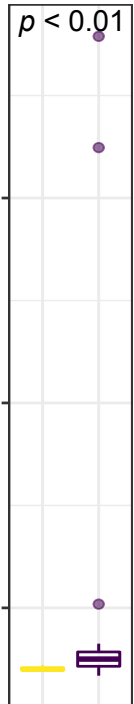

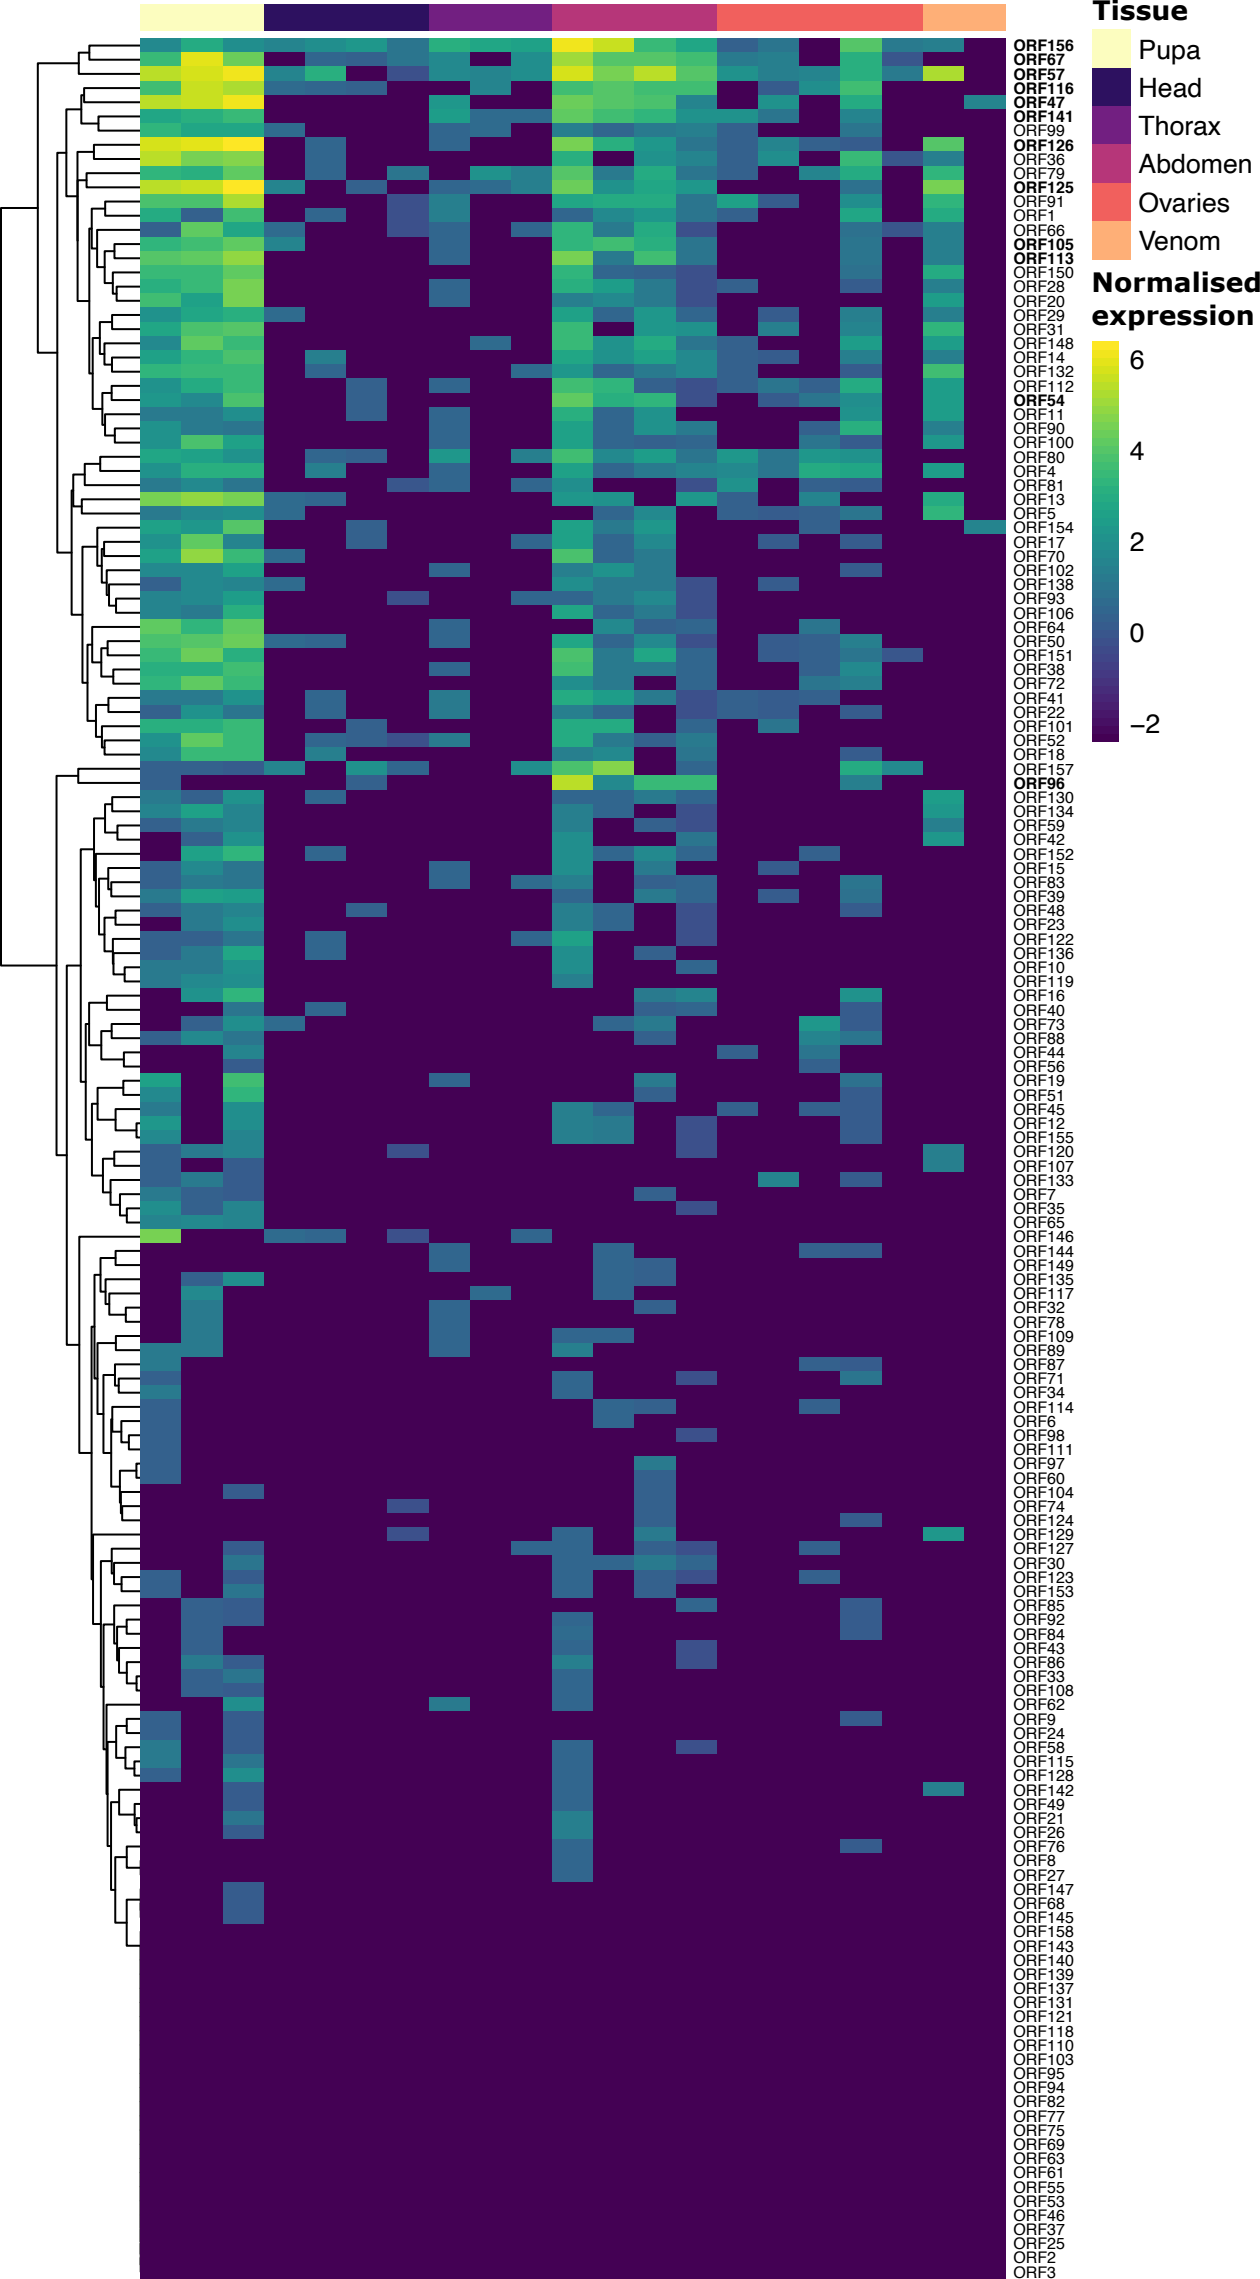

Supplement: Supplementary file [file media-1.pdf]
